# Supplementary material for: Longitudinal Prediction of Mental Health Outcomes in Vulnerable Youth using Machine Learning
Source: Research Square preprint supplement (doi:10.21203/rs.3.rs-4742021/v2), 2025-09-08
Supplement: Supplementary file 1 [file fdf4d2ba2c246e20ae341286.docx]

**Table S1.** Variables used for the risk prediction of the models. The files indicate the sweep number. The suffix ‘cm’ is referred to the cohort member (children / teenager).The suffix ‘cm_interview’ indicates that it is answered by the cohort member. The suffix ‘parents_interview’ indicates that it is answered by the responders, caregivers among themselves whereas ‘parent_cm_interview’ is reported by the caregivers about the children. Non-specific answers (e.g., 'I don't know', ‘Not applicable’, among others) are considered missing values. (*) indicates that the variable is considered as ‘continous’.

| Names | Description | File | Description of Categories |
| --- | --- | --- | --- |
| Development and birth variables | | | |
| ACGIVE00 | Development: gives toy | mcs1_parent_cm_interview | Value = -9.0 Label = Refusal Value = -8.0 Label = Don't Know Value = -1.0 Label = Not applicable Value = 1.0 Label = Often Value = 2.0 Label = Sometimes Value = 3.0 Label = Not yet |
| ACGRAB00 | Development: grabs objects | mcs1_parent_cm_interview | "" |
| ACHAND00 | Development: hands together | mcs1_parent_cm_interview | "" |
| ACNODS00 | Development: nods for yes | mcs1_parent_cm_interview | "" |
| ACPICK00 | Development: holds small objects | mcs1_parent_cm_interview | "" |
| ACPTOY00 | Development: passes a toy | mcs1_parent_cm_interview | "" |
| ACSITU00 | Development: sits up | mcs1_parent_cm_interview | "" |
| ACSMIL00 | Development: smiles | mcs1_parent_cm_interview | "" |
| ACSTAN00 | Development: stands up holding on | mcs1_parent_cm_interview | "" |
| ACWAVE00 | Development: waves bye-bye | mcs1_parent_cm_interview | "" |
| ADBWGT00 | DV Cohort Member birth weight in kilos (*) | mcs1_cm_derived.sav | Value = -8.0 Label = Dont Know  Value = -1.0 Label = Not applicable |
| APDEWM0A | Type of delivery MC1 | mcs1_parent_interview.sav | Value = -9.0 Label = Refusal Value = -8.0 Label = Dont Know Value = -1.0 Label = Not applicable Value = 1.0 Label = ... a normal delivery, Value = 2.0 Label = assisted with forceps, Value = 3.0 Label = assisted vacuum extraction, Value = 4.0 Label = assisted breach, Value = 5.0 Label = a planned Caesarian, Value = 6.0 Label = an emergency Caesarian, Value = 51.0 Label = Other/Other assisted delivery Value = 52.0 Label = Other/Water birth Value = 85.0 Label = Other answer (not codeable) Value = 86.0 Label = Irrelevant response Value = 95.0 Label = or, another type of delivery? |
| APDROF00 | Frequency of alcohol consumption during pregnancy? | mcs1_parent_interview | Value = -9.0 Label = Refusal Value = -8.0 Label = Don't Know Value = -1.0 Label = Not applicable Value = 1.0 Label = Every day Value = 2.0 Label = 5-6 times per week Value = 3.0 Label = 3-4 times per week Value = 4.0 Label = 1-2 times per week Value = 5.0 Label = 1-2 times per month Value = 6.0 Label = Less than once a month Value = 7.0 Label = Never |
| APILPR00 | Any illnesses or problems during pregnancy | mcs1_parent_interview.sav | Value = -9.0 Label = Refusal Value = -8.0 Label = Dont Know Value = -1.0 Label = Not applicable Value = 1.0 Label = Yes Value = 2.0 Label = No |
| APWRBM0AR | Problems at birth or in first week MC1 recoded | mcs1_parent_cm_interview.sav | Value = -9.0 Label = Refusal Value = -8.0 Label = Dont Know Value = -1.0 Label = Not applicable Value = 1.0 Label = No problems Value = 2.0 Label = Delay in breathing at birth Value = 3.0 Label = Breathing difficulty or distress in first week Value = 4.0 Label = Jaundice requiring hospital treatment Value = 5.0 Label = Infection or suspected infection Value = 51.0 Label = Other/Low body temperature Value = 52.0 Label = Other/Low blood sugar level Value = 53.0 Label = Other/Cord around neck Value = 54.0 Label = Other/Birth injury Value = 55.0 Label = Other/Meconium, mucus or fluid aspiration, heart rate or oth Value = 56.0 Label = Other/Failure to thrive, excess loss of weight Value = 57.0 Label = Other/Mention of intensive care, special care unit, incubator Value = 58.0 Label = Other/Tube fed, nasogastric feeds Value = 59.0 Label = Other/Other feeding problems, vomiting Value = 60.0 Label = Other/Other major procedures, transfusion, operation, ventilator Value = 61.0 Label = Other/Maternal problem without mention of baby Value = 62.0 Label = Other/Born early, premature, low birth weight Value = 63.0 Label = Other/Convulsions, fits, jittery Value = 70.0 Label = Other/Congenital heart disease, definite Value = 71.0 Label = Other/Congenital heart disease, not yet definite Value = 72.0 Label = Other/Congenital dislocation of hip, definite Value = 73.0 Label = Other/Congenital dislocation of hip, not yet definite Value = 74.0 Label = Other/Clubfoot (Talipes equinovarus), definite Value = 75.0 Label = Other/Talipes, not yet definite Value = 76.0 Label = Other/Specified skeletal abnormalities Value = 77.0 Label = Other/Urogenital abnormalities Value = 78.0 Label = Other/Gastrointestinal abnormalities Value = 79.0 Label = Other/Harelip/cleft palate Value = 80.0 Label = Other/Skin abnormalities Value = 81.0 Label = Other/Chromosomal or genetic abnormalities Value = 82.0 Label = Other/Brain, central nervous, spinal cord or special sense a Value = 83.0 Label = Other/Other congenital abnormalities major Value = 84.0 Label = Other/Other congenital abnormalities minor Value = 85.0 Label = Other answer (not codeable 1-5, 51-63, Value = 86.0 Label = Irrelevant response Value = 94.0 Label = Other problems in first week Value = 95.0 Label = Other problems at birth Value = 99.0 Label = Recoded - see SecureAccess data |
| BPSPLM0A | Concerns about CM speech/language (A) [No concerns about speech] | mcs2_parent_cm_interview.sav | Value = -1.0 Label = Not applicable Value = 0.0 Label = No Value = 1.0 Label = Yes |
| BPWOHD00 | Other concerns about health/development | mcs2_parent_cm_interview.sav | Value = -1.0 Label = Not applicable Value = 1.0 Label = Yes Value = 2.0 Label = No |
| Previous health history before baseline (11 years old) | | | |
| Kessler history of main caregivers | Calculated (OR Binary >=13 for each BDKESS00, CDKESS00, DDKESSLER) | mcsx_parent_derived x:[2:4] |  |
| Longstanding illness -children history | Calculated (OR BPCLSI00, CPCLSI00 and DPCLSI00) | mcsx_parent_cm_interview x:[2:4] |  |
| Longstanding illness -caregivers’ history | Calculated (OR BPLOIL00, CPLOIL00 and DPLOIL00) | mcsx_parent_interview x:[2:4] |  |
| Parent´s health | | | |
| EPLOIL00 | Whether respondent (caregiver) has longstanding illness | mcs5_parent_interview.sav | Value = 1.0 Label = Yes Value = 2.0 Label = No Value = 3.0 Label = Refused Value = 4.0 Label = Don't know Value = -9.0 Label = Refusal Value = -8.0 Label = Don't know Value = -1.0 Label = Not applicable |
| EPALDR00 | Frequency of alcohol consumption | mcs5_parent_interview.sav | Value = 1.0 Label = 4 or more times a week Value = 2.0 Label = 2-3 times a week Value = 3.0 Label = 2-4 times per month Value = 4.0 Label = Monthly or less Value = 5.0 Label = Never Value = 6.0 Label = Don't know/don't wish to answer Value = -9.0 Label = Not answered Value = -1.0 Label = Not applicable |
| FDKESSL | S6 DV Kessler K6 Scale (*) | mcs6_parent_derived.sav |  |
| FPDRUG00 | Used recreational drugs in past 12 months | mcs6_parent_interview.sav | Value = 1.0 Label = Occasionally  Value = 2.0 Label = Regularly  Value = 3.0 Label = Never  Value = 4.0 Label = Dont know/Dont wish to answer Value = -1.0 Label = Not applicable |
| FPLOIL00 | Whether respondent has longstanding illness | mcs6_parent_interview.sav | Value = 1.0 Label = Yes  Value = 2.0 Label = No  Value = -9.0 Label = Refused Value = -8.0 Label = Dont know  Value = -1.0 Label = Not applicable |
| FPSMUS0A | Current smoking MC [No, does not smoke or use tobacco] | mcs6_parent_interview.sav | Value = 0.0 Label = No  Value = 1.0 Label = Yes  Value = -9.0 Label = Refused Value = -8.0 Label = Don't know  Value = -1.0 Label = Not applicable |
| Sociodemographic data | | | |
| FCCSEX00 | [Recoded:0: female 1:male] | mcs6_cm_interview.sav |  |
| ADC06E00 | Ethnicity Calculated (binary: white versus non-white) | mcs1_cm_derived |  |
| EOEDP000 | S5 DV OECD Below 60% median indicator | mcs5_family_derived.sav | Value = 0.0 Label = Above 60% median  Value = 1.0 Label = Below 60% median  Value = -1.0 Label = Not applicable |
| FOEDP000 | S6 DV OECD Below 60% median indicator | mcs6_family_derived.sav | Value = 0.0 Label = Above 60% median  Value = 1.0 Label = Below 60% median  Value = -1.0 Label = Not applicable |
| Poverty sweeps history | Calculated (OR ADOEDP00, BDOEDP00, CDOEDP00, DDOEDP00) | mcs1_family_derived x:[1:4] |  |
| Self-report and measurements at 11 years old | | | |
| ECWTCMA0 | Weight in kilos (*) | mcs5_cm_interview.sav | Value = -7.0 Label = No answer Value = -1.0 Label = Not applicable |
| EMCS5AGE | Age at interview to nearest 10th of year (*) | mcs5_cm_interview.sav |  |
| EOBFLAG5 | MCS Obesity flag | mcs5_cm_interview.sav | Value = 0.0 Label = Not overweight (including underweight) Value = 1.0 Label = Overweight Value = 2.0 Label = Obese Value = -1.0 Label = Not applicable |
| EBMIN5 | Body Mass Index calculated (CLS) (*) | mcs5_cm_interview.sav | Value = -1.0 Label = Not applicable |
| ECBFPC00 | Body Fat measurement displayed on scales (*) | mcs5_cm_interview.sav | Value = -7.0 Label = No answer Value = -1.0 Label = Not applicable |
| ECHTCMA0 | Height in cms (*) | mcs5_cm_interview.sav | Value = -7.0 Label = No answer Value = -1.0 Label = Not applicable |
| ECQ01X00 | How often do you listen to or play music, not at school? | mcs5_cm_interview.sav | Value = 1.0 Label = Most days Value = 2.0 Label = At least once a week Value = 3.0 Label = At least once a month Value = 4.0 Label = Less often than once a month Value = 5.0 Label = Never Value = -8.0 Label = No answer Value = -1.0 Label = Not applicable |
| ECQ02X00 | How often do you draw, paint or make things, not at school? | mcs5_cm_interview.sav | Value = 1.0 Label = Most days Value = 2.0 Label = At least once a week Value = 3.0 Label = At least once a month Value = 4.0 Label = Less often than once a month Value = 5.0 Label = Never Value = -8.0 Label = No answer Value = -1.0 Label = Not applicable |
| ECQ03X00 | How often do you play sports or active games inside or outside? | mcs5_cm_interview.sav | "" |
| ECQ04X00 | How often do you read for enjoyment, not for school? | mcs5_cm_interview.sav | "" |
| ECQ05X00 | How often do you play games on a computer or games console? | mcs5_cm_interview.sav | "" |
| ECQ06X00 | How often do you use the internet, not at school? | mcs5_cm_interview.sav | "" |
| ECQ07X00 | How often do you use the internet for homework? | mcs5_cm_interview.sav | "" |
| ECQ08X00 | How often do you exchange messages with friends on the internet? | mcs5_cm_interview.sav | "" |
| ECQ09X00 | How often do you visit a social networking website on the internet? | mcs5_cm_interview.sav | "" |
| ECQ10A00 | Your school work - Happiness (*) | mcs5_cm_interview.sav | Value = 1.0 Label = 1 Completely happy Value = 2.0 Label = 2 Value = 3.0 Label = 3 Value = 4.0 Label = 4 Value = 5.0 Label = 5 Value = 6.0 Label = 6 Value = 7.0 Label = 7 Not at all happy Value = -8.0 Label = No answer Value = -1.0 Label = Not applicable |
| ECQ10B00 | The way you look - Happiness (*) | mcs5_cm_interview.sav | "" |
| ECQ10C00 | Your family - Happiness (*) | mcs5_cm_interview.sav | "" |
| ECQ10D00 | Your friends - Happiness (*) | mcs5_cm_interview.sav | "" |
| ECQ10E00 | The school you go to - Happiness (*) | mcs5_cm_interview.sav | "" |
| ECQ10F00 | Your life as a whole - Happiness (*) | mcs5_cm_interview.sav | "" |
| ECQ11A00 | On the whole, I am satisfied with myself | mcs5_cm_interview.sav | Value = 1.0 Label = Strongly agree Value = 2.0 Label = Agree Value = 3.0 Label = Disagree Value = 4.0 Label = Strongly disagree Value = -8.0 Label = No answer Value = -1.0 Label = Not applicable |
| ECQ11B00 | I feel that I have a number of good qualities | mcs5_cm_interview.sav | "" |
| ECQ11C00 | I am able to do things as well as most other people | mcs5_cm_interview.sav | "" |
| ECQ11D00 | I am a person of value | mcs5_cm_interview.sav | "" |
| ECQ11E00 | I feel good about myself | mcs5_cm_interview.sav | "" |
| ECQ12X00 | How many of your friends live in the same area as you? | mcs5_cm_interview.sav | Value = 1.0 Label = All of them Value = 2.0 Label = Most of them Value = 3.0 Label = Some of them Value = 4.0 Label = None of them Value = 5.0 Label = Dont have any friends Value = -8.0 Label = No answer Value = -1.0 Label = Not applicable |
| ECQ13X00 | How many of your friends go to a different school than you? | mcs5_cm_interview.sav | "" |
| ECQ14X00 | Are your friends mostly boys, mostly girls or a mixture? | mcs5_cm_interview.sav | Value = 1.0 Label = Mostly boys Value = 2.0 Label = Mostly girls Value = 3.0 Label = A mixture of boys and girls Value = 4.0 Label = Dont have any friends Value = -8.0 Label = No answer Value = -1.0 Label = Not applicable |
| ECQ15X00 | How many of your friends are from the same ethnic group as you? | mcs5_cm_interview.sav | Value = 1.0 Label = All of them Value = 2.0 Label = Most of them Value = 3.0 Label = Some of them Value = 4.0 Label = None of them Value = 5.0 Label = Dont have any friends Value = -8.0 Label = No answer Value = -1.0 Label = Not applicable |
| ECQ16X00 | How often do you argue or fall out with your friends? | mcs5_cm_interview.sav | Value = 1.0 Label = Most days Value = 2.0 Label = At least once a week Value = 3.0 Label = At least once a month Value = 4.0 Label = Less often than once a month Value = 5.0 Label = Never Value = 6.0 Label = Dont have any friends Value = -8.0 Label = No answer Value = -1.0 Label = Not applicable |
| ECQ17X00 | When not at school, how often do you spend time with your friends? | mcs5_cm_interview.sav | Value = 1.0 Label = Most days Value = 2.0 Label = At least once a week Value = 3.0 Label = At least once a month Value = 4.0 Label = Less often than once a month Value = 5.0 Label = Never Value = 6.0 Label = Dont have any friends Value = -8.0 Label = No answer Value = -1.0 Label = Not applicable |
| ECQ18X00 | At the weekend how often do you spend time with your friends? | mcs5_cm_interview.sav | Value = 1.0 Label = Most weekends Value = 2.0 Label = At least once a month Value = 3.0 Label = Less often than once a month Value = 4.0 Label = Never Value = 5.0 Label = Dont have any friends Value = -8.0 Label = No answer Value = -1.0 Label = Not applicable |
| ECQ19X00 | In the afternoon after school how often do you spend time with your friends? | mcs5_cm_interview.sav | Value = 1.0 Label = Most days Value = 2.0 Label = At least once a week Value = 3.0 Label = At least once a month Value = 4.0 Label = Less often than once a month Value = 5.0 Label = Never Value = 6.0 Label = Dont have any friends Value = -8.0 Label = No answer Value = -1.0 Label = Not applicable |
| ECQ20X00 | Do you get pocket money regularly? | mcs5_cm_interview.sav | Value = 1.0 Label = Yes Value = 2.0 Label = No Value = -8.0 Label = No answer Value = -1.0 Label = Not applicable |
| ECQ21X00 | Compared to your friends, is your family richer, poorer or the same? | mcs5_cm_interview.sav | Value = 1.0 Label = Richer Value = 2.0 Label = Poorer Value = 3.0 Label = About the same Value = 4.0 Label = Dont know Value = -8.0 Label = No answer Value = -1.0 Label = Not applicable |
| ECQ22A00 | I wish my family could afford to buy me more of what I want | mcs5_cm_interview.sav | Value = 1.0 Label = Strongly agree Value = 2.0 Label = Agree Value = 3.0 Label = Disagree Value = 4.0 Label = Strongly disagree Value = -8.0 Label = No answer Value = -1.0 Label = Not applicable |
| ECQ22B00 | I like clothing with popular labels | mcs5_cm_interview.sav | "" |
| ECQ22C00 | It bothers me if my friends have things I dont | mcs5_cm_interview.sav | "" |
| ECQ23X00 | How safe is it to walk, play or hang out in this area during the day? | mcs5_cm_interview.sav | Value = 1.0 Label = Very safe Value = 2.0 Label = Safe Value = 3.0 Label = Not very safe Value = 4.0 Label = Not at all safe Value = -8.0 Label = No answer Value = -1.0 Label = Not applicable |
| ECQ24X00 | Are there any parks in this area where children your age can play? | mcs5_cm_interview.sav | Value = 1.0 Label = Yes Value = 2.0 Label = No Value = -8.0 Label = No answer Value = -1.0 Label = Not applicable |
| ECQ25X00 | Have you ever been noisy or rude in a public place? | mcs5_cm_interview.sav | "" |
| ECQ26X00 | Have you ever taken something from a shop without paying for it? | mcs5_cm_interview.sav | "" |
| ECQ27X00 | Have you ever written things or sprayed paint on a building? | mcs5_cm_interview.sav | "" |
| ECQ28X00 | Have you ever on purpose damaged anything in a public place? | mcs5_cm_interview.sav | "" |
| ECQ29X00 | How much do you like school? | mcs5_cm_interview.sav | Value = 1.0 Label = A lot Value = 2.0 Label = A bit Value = 3.0 Label = Not at all Value = -8.0 Label = No answer Value = -1.0 Label = Not applicable |
| ECQ35X00 | How often do you try your best at school? | mcs5_cm_interview.sav | Value = 1.0 Label = All of the time Value = 2.0 Label = Most of the time Value = 3.0 Label = Some of the time Value = 4.0 Label = Never Value = -8.0 Label = No answer Value = -1.0 Label = Not applicable |
| ECQ36X00 | How often do you find school interesting? | mcs5_cm_interview.sav | "" |
| ECQ37X00 | How often do you feel unhappy at school? | mcs5_cm_interview.sav | "" |
| ECQ38X00 | How often do you get tired at school? | mcs5_cm_interview.sav | "" |
| ECQ39X00 | How often do you feel school is a waste of time? | mcs5_cm_interview.sav | "" |
| ECQ40X00 | How often do you misbehave or cause trouble in class? | mcs5_cm_interview.sav | "" |
| ECQ41X00 | How often do other children misbehave or cause trouble in class? | mcs5_cm_interview.sav | "" |
| ECQ42X00 | How often do your parents take an interest in your school work? | mcs5_cm_interview.sav | "" |
| ECQ43X00 | How much do you like your class teacher? | mcs5_cm_interview.sav | Value = 1.0 Label = A lot Value = 2.0 Label = A bit Value = 3.0 Label = Not at all Value = -8.0 Label = No answer Value = -1.0 Label = Not applicable |
| ECQ44X00 | How often do you think your class teacher is getting at you? | mcs5_cm_interview.sav | Value = 1.0 Label = All of the time Value = 2.0 Label = Most of the time Value = 3.0 Label = Some of the time Value = 4.0 Label = Never Value = -8.0 Label = No answer Value = -1.0 Label = Not applicable |
| ECQ45X00 | Have you ever missed school without your parents permission? | mcs5_cm_interview.sav | Value = 1.0 Label = Yes Value = 2.0 Label = No Value = -8.0 Label = No answer Value = -1.0 Label = Not applicable |
| ECQ47X00 | How much are you looking forward to going to secondary school? | mcs5_cm_interview.sav | Value = 1.0 Label = A lot Value = 2.0 Label = A bit Value = 3.0 Label = Not at all Value = 4.0 Label = Already at secondary school Value = -8.0 Label = No answer Value = -1.0 Label = Not applicable |
| ECQ48X00 | How many of your friends are going to the same secondary school as you? | mcs5_cm_interview.sav | Value = 1.0 Label = All of them Value = 2.0 Label = Most of them Value = 3.0 Label = Some of them Value = 4.0 Label = None of them Value = 5.0 Label = Dont have any friends Value = 6.0 Label = Already at secondary school Value = -8.0 Label = No answer Value = -1.0 Label = Not applicable |
| ECQ49X00 | How wrong it is for someone your age to start a fight? | mcs5_cm_interview.sav | Value = 1.0 Label = Very wrong Value = 2.0 Label = A bit wrong Value = 3.0 Label = Not wrong Value = 4.0 Label = Dont know Value = -8.0 Label = No answer Value = -1.0 Label = Not applicable |
| ECQ50X00 | How wrong it is for someone your age to graffiti? | mcs5_cm_interview.sav | "" |
| ECQ51X00 | How wrong it is for someone your age to take some thing? | mcs5_cm_interview.sav | "" |
| ECQ52X00 | How wrong it is to copy or download music? | mcs5_cm_interview.sav | "" |
| ECQ53A00 | Men and women should do the same jobs around the house | mcs5_cm_interview.sav | Value = 1.0 Label = Strongly agree Value = 2.0 Label = Agree Value = 3.0 Label = Disagree Value = 4.0 Label = Strongly disagree Value = -8.0 Label = No answer Value = -1.0 Label = Not applicable |
| ECQ53B00 | It is less important for women to go out to work than it is for men | mcs5_cm_interview.sav | Value = 1.0 Label = Strongly agree Value = 2.0 Label = Agree Value = 3.0 Label = Disagree Value = 4.0 Label = Strongly disagree Value = -8.0 Label = No answer Value = -1.0 Label = Not applicable |
| ECQ54X00 | How often do your brothers or sisters hurt you or pick on you on purpose | mcs5_cm_interview.sav | Value = 1.0 Label = Most days Value = 2.0 Label = About once a week Value = 3.0 Label = About once a month Value = 4.0 Label = Every few months Value = 5.0 Label = Less often Value = 6.0 Label = Never Value = 7.0 Label = Dont have brothers or sisters Value = -8.0 Label = No answer Value = -1.0 Label = Not applicable |
| ECQ55X00 | How often do you hurt or pick on your brothers or sisters on purpose? | mcs5_cm_interview.sav | "" |
| ECQ56X00 | How often do other children hurt you or pick on you on purpose? | mcs5_cm_interview.sav | Value = 1.0 Label = Most days Value = 2.0 Label = About once a week Value = 3.0 Label = About once a month Value = 4.0 Label = Every few months Value = 5.0 Label = Less often Value = 6.0 Label = Never Value = -8.0 Label = No answer Value = -1.0 Label = Not applicable |
| ECQ57X00 | How often do you hurt or pick on other children on purpose? | mcs5_cm_interview.sav | "" |
| ECQ58X00 | How many of your friends smoke cigarettes? | mcs5_cm_interview.sav | Value = 1.0 Label = None of them Value = 2.0 Label = Some of them Value = 3.0 Label = Most of them Value = 4.0 Label = All of them Value = 5.0 Label = Dont know Value = -8.0 Label = No answer Value = -1.0 Label = Not applicable |
| ECQ59X00 | Have you ever tried a cigarette, even if it was only a single puff? | mcs5_cm_interview.sav | Value = 1.0 Label = Yes Value = 2.0 Label = No Value = -8.0 Label = No answer Value = -1.0 Label = Not applicable |
| ECQ60X00 | How many of your friends drink alcohol? | mcs5_cm_interview.sav | Value = 1.0 Label = None of them Value = 2.0 Label = Some of them Value = 3.0 Label = Most of them Value = 4.0 Label = All of them Value = 5.0 Label = Dont know Value = -8.0 Label = No answer Value = -1.0 Label = Not applicable |
| ECQ61X00 | Have you ever had an alcoholic drink? That is more than a few sips. | mcs5_cm_interview.sav | Value = 1.0 Label = Yes Value = 2.0 Label = No Value = -8.0 Label = No answer Value = -1.0 Label = Not applicable |
| ECQ70A00 | Drinking beer, wine is a way to make friends with other people | mcs5_cm_interview.sav | Value = 1.0 Label = Strongly agree Value = 2.0 Label = Agree Value = 3.0 Label = Disagree Value = 4.0 Label = Strongly disagree Value = -8.0 Label = No answer Value = -1.0 Label = Not applicable |
| ECQ70B00 | Drinking alcohol makes people worry less | mcs5_cm_interview.sav | "" |
| ECQ70C00 | It is easier to open up and talk about ones feelings after a few drinks | mcs5_cm_interview.sav | "" |
| ECQ70D00 | Drinking alcohol gets in the way of school work | mcs5_cm_interview.sav | "" |
| ECQ70E00 | Drinking alcohol makes people happier with themselves | mcs5_cm_interview.sav | "" |
| ECQ70F00 | Drinking alcohol makes it hard to get along with friends | mcs5_cm_interview.sav | "" |
| ECQ70G00 | If I drank alcohol without my parents permission I would be caught | mcs5_cm_interview.sav | "" |
| ECQ71X00 | How much people risk harming themselves if they try one or two drinks | mcs5_cm_interview.sav | Value = 1.0 Label = No risk Value = 2.0 Label = Slight risk Value = 3.0 Label = Some risk Value = 4.0 Label = Great risk Value = -8.0 Label = No answer Value = -1.0 Label = Not applicable |
| ECQ72X00 | How much people risk harming themselves by drinking one or two per day | mcs5_cm_interview.sav | "" |
| ECQ73X00 | How much people risk harming themselves by drinking four or five per day | mcs5_cm_interview.sav | "" |
| ECQ74X00 | In the last 4 weeks, how often did you feel happy? | mcs5_cm_interview.sav | Value = 1.0 Label = Never Value = 2.0 Label = Almost never Value = 3.0 Label = Sometimes Value = 4.0 Label = Often Value = 5.0 Label = Almost always Value = -8.0 Label = No answer Value = -1.0 Label = Not applicable |
| ECQ75X00 | In the last 4 weeks, how often worried about what would happen | mcs5_cm_interview.sav | "" |
| ECQ76X00 | In the last 4 weeks, how often did you feel sad? | mcs5_cm_interview.sav | "" |
| ECQ77X00 | In the last 4 weeks, how often did you feel afraid or scared? | mcs5_cm_interview.sav | "" |
| ECQ78X00 | In the last 4 weeks, how often did you laugh? | mcs5_cm_interview.sav | "" |
| ECQ79X00 | In the last 4 weeks, how often did you get angry? | mcs5_cm_interview.sav | "" |
| ECQ80X0A | What do you do if you are worried about something? MC1 | mcs5_cm_interview.sav | Value = 0.0 Label = Not (Keep it to myself) Value = 1.0 Label = Keep it to myself Value = -8.0 Label = Not answered Value = -1.0 Label = Not applicable |
| ECQ80X0B | What do you do if you are worried about something? MC2 | mcs5_cm_interview.sav | Value = 0.0 Label = Not (Tell a friend) Value = 1.0 Label = Tell a friend Value = -8.0 Label = Not answered Value = -1.0 Label = Not applicable |
| ECQ80X0C | What do you do if you are worried about something? MC3 | mcs5_cm_interview.sav | Value = 0.0 Label = Not (Tell someone at home) Value = 1.0 Label = Tell someone at home Value = -8.0 Label = Not answered Value = -1.0 Label = Not applicable |
| ECQ80X0D | What do you do if you are worried about something? MC4 | mcs5_cm_interview.sav | Value = 0.0 Label = Not (Tell a teacher) Value = 1.0 Label = Tell a teacher Value = -8.0 Label = Not answered Value = -1.0 Label = Not applicable |
| ECQ80X0E | What do you do if you are worried about something? MC5 | mcs5_cm_interview.sav | Value = 0.0 Label = Not (Tell someone else) Value = 1.0 Label = Tell someone else Value = -8.0 Label = Not answered Value = -1.0 Label = Not applicable |
| ECQ81A00 | I care about how well I do at school | mcs5_cm_interview.sav | Value = 1.0 Label = Not at all true Value = 2.0 Label = Somewhat true Value = 3.0 Label = Very true Value = 4.0 Label = Definitely true Value = -8.0 Label = No answer Value = -1.0 Label = Not applicable |
| ECQ81B00 | I feel bad or guilty when I Have done something wrong | mcs5_cm_interview.sav | Value = 1.0 Label = Not at all true Value = 2.0 Label = Somewhat true Value = 3.0 Label = Very true Value = 4.0 Label = Definitely true Value = -8.0 Label = No answer Value = -1.0 Label = Not applicable |
| ECQ81C00 | I do not show my emotions to others | mcs5_cm_interview.sav | "" |
| ECQ81D00 | I am concerned about the feelings of others | mcs5_cm_interview.sav | "" |
| ECQ82X00 | Do you want to stay on at school or college full-time when you are 16? | mcs5_cm_interview.sav | Value = 1.0 Label = Yes Value = 2.0 Label = No Value = 3.0 Label = Don't know Value = -8.0 Label = No answer Value = -1.0 Label = Not applicable |
| ECQ84X0A | By 30, which of the following would you most like to have achieved MC1 | mcs5_cm_interview.sav | Value = 0.0 Label = Not (Owning your own home) Value = 1.0 Label = Owning your own home Value = -8.0 Label = Not answered Value = -1.0 Label = Not applicable |
| ECQ84X0B | By 30, which of the following would you most like to have achieved MC2 | mcs5_cm_interview.sav | Value = 0.0 Label = Not (Having a good car) Value = 1.0 Label = Having a good car Value = -8.0 Label = Not answered Value = -1.0 Label = Not applicable |
| ECQ84X0C | By 30, which of the following would you most like to have achieved MC3 | mcs5_cm_interview.sav | Value = 0.0 Label = Not (Earning a lot of money) Value = 1.0 Label = Earning a lot of money Value = -8.0 Label = Not answered Value = -1.0 Label = Not applicable |
| ECQ84X0D | By 30, which of the following would you most like to have achieved MC4 | mcs5_cm_interview.sav | Value = 0.0 Label = Not (Having a worthwhile job) Value = 1.0 Label = Having a worthwhile job Value = -8.0 Label = Not answered Value = -1.0 Label = Not applicable |
| ECQ84X0E | By 30, which of the following would you most like to have achieved MC5 | mcs5_cm_interview.sav | Value = 0.0 Label = Not (Having children) Value = 1.0 Label = Having children Value = -8.0 Label = Not answered Value = -1.0 Label = Not applicable |
| ECQ84X0F | By 30, which of the following would you most like to have achieved MC6 | mcs5_cm_interview.sav | Value = 0.0 Label = Not (Having a partner, being married) Value = 1.0 Label = Having a partner, being married Value = -8.0 Label = Not answered Value = -1.0 Label = Not applicable |
| ECQ84X0G | By 30, which of the following would you most like to have achieved MC7 | mcs5_cm_interview.sav | Value = 0.0 Label = Not (Being famous) Value = 1.0 Label = Being famous Value = -8.0 Label = Not answered Value = -1.0 Label = Not applicable |
| ECQ84X0H | By 30, which of the following would you most like to have achieved MC8 | mcs5_cm_interview.sav | Value = 0.0 Label = Not (Having a personal achievement in sport etc) Value = 1.0 Label = Having a personal achievement in sport Value = -8.0 Label = Not answered Value = -1.0 Label = Not applicable |
| EPICWO00 | Child appears underweight, average or over weight | mcs5_cm_interview.sav | Value = 1.0 Label = A little/a lot underweight Value = 2.0 Label = Neither underweight nor overweight Value = 3.0 Label = A little/a lot overweight Value = -1.0 Label = Not applicable Value = -1.0 Label = Not applicable |
| Self-report and measurements at 14 years old | | | |
| FCBFPC00 | Body fat percentage (*) | mcs6_cm_interview.sav | Value = -5.0 Label = UNABLE TO OBTAIN HEIGHT MEASUREMENT  Value = -1.0 Label = Not applicable |
| FCHTCM00 | Height in centimeters (*) | mcs6_cm_interview.sav | Value = -5.0 Label = UNABLE TO OBTAIN HEIGHT MEASUREMENT  Value = -1.0 Label = Not applicable |
| FCWTCM00 | Weight in kilos (*) | mcs6_cm_interview.sav | Value = -5.0 Label = UNABLE TO OBTAIN HEIGHT MEASUREMENT  Value = -1.0 Label = Not applicable |
| FCALCD00 | Has CM ever had an alcoholic drink | mcs6_cm_interview.sav | Value = 1.0 Label = Yes  Value = 2.0 Label = No  Value = -9.0 Label = Dont want to answer  Value = -8.0 Label = Dont know  Value = -1.0 Label = Not applicable |
| FCARES00 | Has CM ever been arrested | mcs6_cm_interview.sav | "" |
| FCASWD00 | How often does CM drink artifically sweetened drinks | mcs6_cm_interview.sav | Value = 1.0 Label = More than once a day  Value = 2.0 Label = Once a day  Value = 3.0 Label = 3-6 days a week Value = 4.0 Label = 1-2 days a week Value = 5.0 Label = Less often but at least once a month  Value = 6.0 Label = Less than once a month  Value = 7.0 Label = Hardly ever or never  Value = -9.0 Label = Dont want to answer  Value = -8.0 Label = Dont know  Value = -1.0 Label = Not applicable |
| FCATQL00 | Needs qualifications to get a job worth having | mcs6_cm_interview.sav | Value = 1.0 Label = Strongly agree  Value = 2.0 Label = Agree  Value = 3.0 Label = Disagree  Value = 4.0 Label = Strongly disagree  Value = 5.0 Label = Dont know/Dont wish to answer Value = -1.0 Label = Not applicable |
| FCAWNT00 | Past 12months:freq of CM staying out without Parent knowing | mcs6_cm_interview.sav | Value = 1.0 Label = No never  Value = 2.0 Label = Yes, once or a few times  Value = 3.0 Label = Yes, lots of times  Value = -9.0 Label = Dont want to answer  Value = -8.0 Label = Dont know  Value = -1.0 Label = Not applicable |
| FCBAND00 | ActivGrid: Sing in a choir or play in a band or orchestra? | mcs6_cm_interview.sav | Value = 1.0 Label = Most days  Value = 2.0 Label = At least once a week  Value = 3.0 Label = At least once a month  Value = 4.0 Label = Several times a year  Value = 5.0 Label = Once a year or less  Value = 6.0 Label = Never or almost never  Value = -9.0 Label = Don't want to answer  Value = -8.0 Label = Don't know  Value = -1.0 Label = Not applicable |
| FCBFCK00 | CM is fitted with a pacemaker | mcs6_cm_interview.sav | Value = 1.0 Label = Young person has no pacemaker  Value = 2.0 Label = Young person has a pacemaker  Value = -1.0 Label = Not applicable |
| FCBGFR00 | Does CM have a boyfriend/girlfriend | mcs6_cm_interview.sav | Value = 1.0 Label = Yes  Value = 2.0 Label = No  Value = -9.0 Label = Dont want to answer  Value = -8.0 Label = Dont know  Value = -1.0 Label = Not applicable |
| FCBRKN00 | Days per week CM eats breakfast | mcs6_cm_interview.sav | Value = 1.0 Label = Never  Value = 2.0 Label = Some days, but not all days  Value = 3.0 Label = Every day  Value = -9.0 Label = Dont want to answer  Value = -8.0 Label = Dont know  Value = -1.0 Label = Not applicable |
| FCBTNG00 | ConsumAttGrid: It bothers me if my friends have things I dont | mcs6_cm_interview.sav | Value = 1.0 Label = Strongly agree  Value = 2.0 Label = Agree  Value = 3.0 Label = Disagree  Value = 4.0 Label = Strongly disagree  Value = -9.0 Label = Don't want to answer  Value = -8.0 Label = Don't know  Value = -1.0 Label = Not applicable |
| FCBULB00 | How often brothers or sisters hurt or pick on CM | mcs6_cm_interview.sav | Value = 1.0 Label = Most days  Value = 2.0 Label = About once a week  Value = 3.0 Label = About once a month  Value = 4.0 Label = Every few months  Value = 5.0 Label = Less often  Value = 6.0 Label = Never  Value = 7.0 Label = Dont have brothers or sisters  Value = -9.0 Label = Dont want to answer  Value = -8.0 Label = Dont know  Value = -1.0 Label = Not applicable |
| FCBULP00 | How often CM hurts or picks on brothers or sisters | mcs6_cm_interview.sav | "" |
| FCCANB00 | DruGrid: Cannabis (also known as weed, marijuana, dope, hash or skunk)? | mcs6_cm_interview.sav | Value = 1.0 Label = Yes  Value = 2.0 Label = No  Value = -9.0 Label = Dont want to answer  Value = -8.0 Label = Dont know  Value = -1.0 Label = Not applicable |
| FCCAUT00 | Has CM ever been given a formal warning or caution from police | mcs6_cm_interview.sav | "" |
| FCCDDL00 | (last 12 months) has CM cuddled with another young person? | mcs6_cm_interview.sav | "" |
| FCCGHE00 | CMs general level of health | mcs6_cm_interview.sav | Value = 1.0 Label = Excellent  Value = 2.0 Label = Very good  Value = 3.0 Label = Good  Value = 4.0 Label = Fair  Value = 5.0 Label = Poor  Value = -9.0 Label = Dont want to answer  Value = -8.0 Label = Dont know  Value = -1.0 Label = Not applicable |
| FCCINE00 | ActivGrid: Go to the cinema? | mcs6_cm_interview.sav | Value = 1.0 Label = Most days  Value = 2.0 Label = At least once a week  Value = 3.0 Label = At least once a month  Value = 4.0 Label = Several times a year  Value = 5.0 Label = Once a year or less  Value = 6.0 Label = Never or almost never  Value = -9.0 Label = Dont want to answer  Value = -8.0 Label = Dont know  Value = -1.0 Label = Not applicable |
| FCCMEX00 | Does CM have computer of their own | mcs6_cm_interview.sav | Value = 1.0 Label = Yes  Value = 2.0 Label = No  Value = -9.0 Label = Dont want to answer  Value = -8.0 Label = Dont know  Value = -1.0 Label = Not applicable |
| FCCOMH00 | Hours per WEEKDAY spent playing electronic games | mcs6_cm_interview.sav | Value = 1.0 Label = None  Value = 2.0 Label = Less than half an hour  Value = 3.0 Label = Half an hour to less than 1 hour  Value = 4.0 Label = 1 hour to less than 2 hours  Value = 5.0 Label = 2 hours to less than 3 hours  Value = 6.0 Label = 3 hours to less than 5 hours  Value = 7.0 Label = 5 hours to less than 7 hours  Value = 8.0 Label = 7 hours or more Value = -9.0 Label = Don't want to answer  Value = -8.0 Label = Don't know  Value = -1.0 Label = Not applicable |
| FCCOPY00 | Wrong to download music/films/games without paying | mcs6_cm_interview.sav | Value = 1.0 Label = Very wrong  Value = 2.0 Label = A bit wrong  Value = 3.0 Label = Not wrong  Value = -9.0 Label = Don't want to answer  Value = -8.0 Label = Don't know  Value = -1.0 Label = Not applicable |
| FCCYBO00 | How often CM bullied other children online | mcs6_cm_interview.sav | Value = 1.0 Label = Most days  Value = 2.0 Label = About once a week  Value = 3.0 Label = About once a month  Value = 4.0 Label = Every few months  Value = 5.0 Label = Less often  Value = 6.0 Label = Never  Value = -9.0 Label = Don't want to answer  Value = -8.0 Label = Don't know  Value = -1.0 Label = Not applicable |
| FCCYBU00 | How often other children bullied CM online | mcs6_cm_interview.sav | "" |
| FCCYCF00 | How often does CM use a bicycle | mcs6_cm_interview.sav | Value = 1.0 Label = Every day or almost every day  Value = 2.0 Label = Several times a week  Value = 3.0 Label = Once or twice a week  Value = 4.0 Label = At least once a month  Value = 5.0 Label = Every few months  Value = 6.0 Label = At least once a year  Value = 7.0 Label = Less often or never  Value = 8.0 Label = Do not use a bicycle  Value = -9.0 Label = Dont want to answer  Value = -8.0 Label = Dont know  Value = -1.0 Label = Not applicable |
| FCCYCT00 | Has CM has any formal cycle training | mcs6_cm_interview.sav | Value = 1.0 Label = Yes  Value = 2.0 Label = No  Value = -9.0 Label = Dont want to answer  Value = -8.0 Label = Dont know  Value = -1.0 Label = Not applicable |
| FCDAMG00 | Past 12 months: has CM damaged something that didnt belong to them | mcs6_cm_interview.sav | Value = 1.0 Label = Yes  Value = 2.0 Label = No  Value = -9.0 Label = Dont want to answer  Value = -8.0 Label = Dont know  Value = -1.0 Label = Not applicable |
| FCDISG00 | DisciplineGrid: Ground you, stop you going out or from seeing your friends? | mcs6_cm_interview.sav | "" |
| FCDISP00 | DisciplineGrid: Punish you in some other way? | mcs6_cm_interview.sav | "" |
| FCDIST00 | DisciplineGrid: Tell you off or shout at you? | mcs6_cm_interview.sav | Value = 1.0 Label = Yes  Value = 2.0 Label = No  Value = -9.0 Label = Dont want to answer  Value = -8.0 Label = Dont know  Value = -1.0 Label = Not applicable |
| FCDOWL00 | RosenbergGrid: I am able to do things as well as most other people | mcs6_cm_interview.sav | Value = 1.0 Label = Strongly agree  Value = 2.0 Label = Agree  Value = 3.0 Label = Disagree  Value = 4.0 Label = Strongly disagree  Value = -9.0 Label = Don't want to answer  Value = -8.0 Label = Don't know  Value = -1.0 Label = Not applicable |
| FCDRFN00 | How many of CMs friends drink alcohol | mcs6_cm_interview.sav | Value = 1.0 Label = None of them  Value = 2.0 Label = Some of them  Value = 3.0 Label = Most of them  Value = 4.0 Label = All of them  Value = -9.0 Label = Dont want to answer  Value = -8.0 Label = Dont know  Value = -1.0 Label = Not applicable |
| FCDRFR00 | Do CMs friends take any illegal drugs | mcs6_cm_interview.sav | Value = 1.0 Label = None of them  Value = 2.0 Label = Some of them  Value = 3.0 Label = Most of them  Value = 4.0 Label = All of them  Value = -9.0 Label = Dont want to answer  Value = -8.0 Label = Dont know  Value = -1.0 Label = Not applicable |
| FCECIG00 | How often CM smokes e-cigarettes | mcs6_cm_interview.sav | Value = 1.0 Label = Ive never used or tried electronic cigarettes (e-cigarettes) Value = 2.0 Label = I have used e-cigarettes but dont at at all now Value = 3.0 Label = I now smoke e-cigarettes occasionally but not every day Value = 4.0 Label = I smoke e-cigarettes every day  Value = -9.0 Label = Dont want to answer  Value = -8.0 Label = Dont know  Value = -1.0 Label = Not applicable |
| FCETLS00 | Has CM ever eaten less to lose weight | mcs6_cm_interview.sav | Value = 1.0 Label = Yes  Value = 2.0 Label = No  Value = -9.0 Label = Dont want to answer  Value = -8.0 Label = Dont know  Value = -1.0 Label = Not applicable |
| FCEXWT00 | Has CM ever exercised to lose weight | mcs6_cm_interview.sav | Value = 1.0 Label = Yes  Value = 2.0 Label = No  Value = -9.0 Label = Dont want to answer  Value = -8.0 Label = Dont know  Value = -1.0 Label = Not applicable |
| FCFGHT00 | Wrong to start a fight | mcs6_cm_interview.sav | Value = 1.0 Label = Very wrong  Value = 2.0 Label = A bit wrong  Value = 3.0 Label = Not wrong  Value = -9.0 Label = Dont want to answer  Value = -8.0 Label = Dont know  Value = -1.0 Label = Not applicable |
| FCFMLY00 | WellbeingGrid: How happy is CM with family (*) | mcs6_cm_interview.sav | Value = 1.0 Label = Completely happy  Value = 7.0 Label = Not at all happy  Value = -8.0 Label = Don't know  Value = -9.0 Label = Don't want to answer  Value = -1.0 Label = Not applicable |
| FCFRNS00 | WellbeingGrid: How happy is CM with friends (*) | mcs6_cm_interview.sav | "" |
| FCFRSM00 | How many of your close friends live in the same area as you? | mcs6_cm_interview.sav | Value = 1.0 Label = All of them  Value = 2.0 Label = Most of them  Value = 3.0 Label = Some of them  Value = 4.0 Label = None of them  Value = -9.0 Label = Dont want to answer  Value = -8.0 Label = Dont know  Value = -1.0 Label = Not applicable |
| FCFRSS00 | How many of your close friends go to the same school as you? | mcs6_cm_interview.sav | Value = 1.0 Label = All of them  Value = 2.0 Label = Most of them  Value = 3.0 Label = Some of them  Value = 4.0 Label = None of them  Value = -9.0 Label = Dont want to answer  Value = -8.0 Label = Dont know  Value = -1.0 Label = Not applicable |
| FCFRUT00 | How often CM eats at least 2 portions of fruit | mcs6_cm_interview.sav | Value = 1.0 Label = Never  Value = 2.0 Label = Some days, but not all days  Value = 3.0 Label = Every day  Value = -9.0 Label = Don't want to answer  Value = -8.0 Label = Don't know  Value = -1.0 Label = Not applicable |
| FCGAEM00 | GamblinGrid: Placing a bet @ betting shop, eg football or horseracing? | mcs6_cm_interview.sav | Value = 1.0 Label = Yes  Value = 2.0 Label = No  Value = -9.0 Label = Don't want to answer  Value = -8.0 Label = Don't know  Value = -1.0 Label = Not applicable |
| FCGAMA00 | GamblinGrid: Fruit machines? | mcs6_cm_interview.sav | Value = 1.0 Label = Yes  Value = 2.0 Label = No  Value = -9.0 Label = Dont want to answer  Value = -8.0 Label = Dont know  Value = -1.0 Label = Not applicable |
| FCGAMJ00 | GamblinGrid: Any other gambling? | mcs6_cm_interview.sav | "" |
| FCGANG00 | Is CM a member of a street gang | mcs6_cm_interview.sav | Value = 1.0 Label = Yes  Value = 2.0 Label = No  Value = 3.0 Label = I used to be a member but am not any more Value = -9.0 Label = Dont want to answer  Value = -8.0 Label = Dont know  Value = -1.0 Label = Not applicable |
| FCGDQL00 | RosenbergGrid: I feel I have a number of good qualities | mcs6_cm_interview.sav | Value = 1.0 Label = Strongly agree  Value = 2.0 Label = Agree  Value = 3.0 Label = Disagree  Value = 4.0 Label = Strongly disagree  Value = -9.0 Label = Don't want to answer  Value = -8.0 Label = Don't know  Value = -1.0 Label = Not applicable |
| FCGDSF00 | RosenbergGrid: I feel good about myself | mcs6_cm_interview.sav | "" |
| FCGMBL00 | GamblinGrid: Placing a private bet for money (e.g. with friends)? | mcs6_cm_interview.sav | Value = 1.0 Label = Yes  Value = 2.0 Label = No  Value = -9.0 Label = Don't want to answer  Value = -8.0 Label = Don't know  Value = -1.0 Label = Not applicable |
| FCGRSE00 | How often do you see any of your grandparents? | mcs6_cm_interview.sav | Value = 1.0 Label = Every day or almost every day  Value = 2.0 Label = Several times a week  Value = 3.0 Label = Once or twice a week  Value = 4.0 Label = Once or twice a month  Value = 5.0 Label = Less often than once a month  Value = 6.0 Label = Not at all  Value = 7.0 Label = No grandparents alive/ None living else Value = -9.0 Label = Dont want to answer  Value = -8.0 Label = Dont know  Value = -1.0 Label = Not applicable |
| FCHACK00 | Past 12 months: has CM hacked into smn elses computer/online account | mcs6_cm_interview.sav | Value = 1.0 Label = Yes  Value = 2.0 Label = No  Value = -9.0 Label = Dont want to answer  Value = -8.0 Label = Dont know  Value = -1.0 Label = Not applicable |
| FCHARM00 | In the past year has CM self-harmed | mcs6_cm_interview.sav | Value = 1.0 Label = Yes  Value = 2.0 Label = No  Value = -9.0 Label = Dont want to answer  Value = -8.0 Label = Dont know  Value = -1.0 Label = Not applicable |
| FCHEAR00 | Does CM have difficulty hearing | mcs6_cm_interview.sav | Value = 1.0 Label = Yes  Value = 2.0 Label = No  Value = -9.0 Label = Dont want to answer  Value = -8.0 Label = Dont know  Value = -1.0 Label = Not applicable |
| FCHHND00 | (last 12 months) has CM held hands with another young person? | mcs6_cm_interview.sav | "" |
| FCHITT00 | ASBOgrid: CM Pushed or shoved/hit/slapped/punched someone? | mcs6_cm_interview.sav | "" |
| FCHLPC00 | How often does anyone at home help with CMs homework | mcs6_cm_interview.sav | Value = 1.0 Label = Always  Value = 2.0 Label = Usually Value = 3.0 Label = Sometimes  Value = 4.0 Label = Never or almost never  Value = -9.0 Label = Dont want to answer  Value = -8.0 Label = Dont know  Value = -1.0 Label = Not applicable |
| FCHURT00 | How often other children hurt or pick on CM | mcs6_cm_interview.sav | Value = 1.0 Label = Most days  Value = 2.0 Label = About once a week  Value = 3.0 Label = About once a month  Value = 4.0 Label = Every few months  Value = 5.0 Label = Less often  Value = 6.0 Label = Never  Value = -9.0 Label = Don't want to answer  Value = -8.0 Label = Don't know  Value = -1.0 Label = Not applicable |
| FCHWKM00 | typical week term-time, how long cm spends doing homework? | mcs6_cm_interview.sav | Value = 1.0 Label = None  Value = 2.0 Label = 1 hour to less than 3 hours  Value = 3.0 Label = 3 hours to less than 5 hours  Value = 4.0 Label = 5 hours to less than 10 hours  Value = 5.0 Label = 10 or more hours  Value = -9.0 Label = Dont want to answer  Value = -8.0 Label = Dont know  Value = -1.0 Label = Not applicable |
| FCIMWK00 | GenderRolesGrid: It is less important for women to work than it is for men | mcs6_cm_interview.sav | Value = 1.0 Label = Strongly agree  Value = 2.0 Label = Agree  Value = 3.0 Label = Disagree  Value = 4.0 Label = Strongly disagree  Value = -9.0 Label = Don't want to answer  Value = -8.0 Label = Don't know  Value = -1.0 Label = Not applicable |
| FCINTH00 | Does CM ever use the internet at home | mcs6_cm_interview.sav | Value = 1.0 Label = None  Value = 2.0 Label = Less than half an hour  Value = 3.0 Label = Half an hour to less than 1 hour  Value = 4.0 Label = 1 hour to less than 2 hours  Value = 5.0 Label = 2 hours to less than 3 hours  Value = 6.0 Label = 3 hours to less than 5 hours  Value = 7.0 Label = 5 hours to less than 7 hours  Value = 8.0 Label = 7 hours or more Value = -9.0 Label = Dont want to answer  Value = -8.0 Label = Dont know  Value = -1.0 Label = Not applicable |
| FCKISS00 | (last 12 months) has CM kissed another young person? | mcs6_cm_interview.sav | Value = 1.0 Label = Yes  Value = 2.0 Label = No  Value = -9.0 Label = Don't want to answer  Value = -8.0 Label = Don't know  Value = -1.0 Label = Not applicable |
| FCKNIF00 | Has CM ever carried a knife or other weapon | mcs6_cm_interview.sav | "" |
| FCLIFE00 | WellbeingGrid: How happy is CM with life as a whole (*) | mcs6_cm_interview.sav | Value = 1.0 Label = Completely happy  Value = 7.0 Label = Not at all happy  Value = -8.0 Label = Don't know  Value = -9.0 Label = Don't want to answer  Value = -1.0 Label = Not applicable |
| FCLSWT00 | What CM is trying to do about their weight | mcs6_cm_interview.sav | Value = 1.0 Label = Lose weight  Value = 2.0 Label = Gain weight  Value = 3.0 Label = Stay the same weight  Value = 4.0 Label = I am not trying to do anything about my Value = -9.0 Label = Dont want to answer  Value = -8.0 Label = Dont know  Value = -1.0 Label = Not applicable |
| FCMAAB00 | Does your natural mother live with you? | mcs6_cm_interview.sav | Value = 1.0 Label = Yes  Value = 2.0 Label = No  Value = -9.0 Label = Dont want to answer  Value = -8.0 Label = Dont know  Value = -1.0 Label = Not applicable |
| FCMDSA00 | FeelingsGrid: I felt miserable or unhappy | mcs6_cm_interview.sav | Value = 1.0 Label = Not true  Value = 2.0 Label = Sometimes  Value = 3.0 Label = True  Value = -9.0 Label = Dont want to answer  Value = -8.0 Label = Dont know  Value = -1.0 Label = Not applicable |
| FCMDSB00 | FeelingsGrid: I didnt enjoy anything at all | mcs6_cm_interview.sav | "" |
| FCMDSC00 | FeelingsGrid: I felt so tired I just sat around and did nothing | mcs6_cm_interview.sav | "" |
| FCMDSD00 | FeelingsGrid: I was very restless | mcs6_cm_interview.sav | "" |
| FCMDSE00 | FeelingsGrid: I felt I was no good any more | mcs6_cm_interview.sav | "" |
| FCMDSF00 | FeelingsGrid: I cried a lot | mcs6_cm_interview.sav | "" |
| FCMDSG00 | FeelingsGrid: I found it hard to think properly or concentrate | mcs6_cm_interview.sav | "" |
| FCMDSH00 | FeelingsGrid: I hated myself | mcs6_cm_interview.sav | "" |
| FCMDSI00 | FeelingsGrid: I was a bad person | mcs6_cm_interview.sav | "" |
| FCMDSJ00 | FeelingsGrid: I felt lonely | mcs6_cm_interview.sav | "" |
| FCMDSK00 | FeelingsGrid: I thought nobody really loved me | mcs6_cm_interview.sav | "" |
| FCMDSL00 | FeelingsGrid: I thought I could never be as good as other kids | mcs6_cm_interview.sav | "" |
| FCMDSM00 | FeelingsGrid: I did everything wrong | mcs6_cm_interview.sav | "" |
| FCMISB00 | How often does CM misbehave in lessons | mcs6_cm_interview.sav | Value = 1.0 Label = All of the time Value = 2.0 Label = Most of the time  Value = 3.0 Label = Some of the time  Value = 4.0 Label = Never  Value = -9.0 Label = Don't want to answer  Value = -8.0 Label = Don't know  Value = -1.0 Label = Not applicable |
| FCMISO00 | How often do other pupils misbehave in lessons | mcs6_cm_interview.sav | "" |
| FCMNWO00 | EducMotGrid: How often difficult to keep mind on work at school? [NCDS, BCS] | mcs6_cm_interview.sav | "" |
| FCMUSM00 | ActivGrid: Go to museums/galleries, visit historic place/stately home? | mcs6_cm_interview.sav | Value = 1.0 Label = Most days  Value = 2.0 Label = At least once a week  Value = 3.0 Label = At least once a month  Value = 4.0 Label = Several times a year  Value = 5.0 Label = Once a year or less  Value = 6.0 Label = Never or almost never  Value = -9.0 Label = Don't want to answer  Value = -8.0 Label = Don't know  Value = -1.0 Label = Not applicable |
| FCNCLS00 | SocSupGrid: There is no one I feel close to. | mcs6_cm_interview.sav | Value = 1.0 Label = Very true  Value = 2.0 Label = Partly true  Value = 3.0 Label = Not true at all Value = -9.0 Label = Don't want to answer  Value = -8.0 Label = Don't know  Value = -1.0 Label = Not applicable |
| FCNUFR00 | Do you have any close friends? (friends = other young people) | mcs6_cm_interview.sav | Value = 1.0 Label = Yes  Value = 2.0 Label = No  Value = -9.0 Label = Dont want to answer  Value = -8.0 Label = Dont know  Value = -1.0 Label = Not applicable |
| FCORGA00 | ActivGrid: Go to youth clubs/scouts/girlguides or oth organised activities? | mcs6_cm_interview.sav | Value = 1.0 Label = Most days  Value = 2.0 Label = At least once a week  Value = 3.0 Label = At least once a month  Value = 4.0 Label = Several times a year  Value = 5.0 Label = Once a year or less  Value = 6.0 Label = Never or almost never  Value = -9.0 Label = Don't want to answer  Value = -8.0 Label = Don't know  Value = -1.0 Label = Not applicable |
| FCOTDR00 | DruGrid: Any other illegal drug (such as ecstasy, cocaine, speed)? | mcs6_cm_interview.sav | Value = 1.0 Label = Yes  Value = 2.0 Label = No  Value = -9.0 Label = Don't want to answer  Value = -8.0 Label = Don't know  Value = -1.0 Label = Not applicable |
| FCOTWD00 | When CM goes out, how often do parents know what CM does? | mcs6_cm_interview.sav | Value = 1.0 Label = Always  Value = 2.0 Label = Usually Value = 3.0 Label = Sometimes  Value = 4.0 Label = Never  Value = -9.0 Label = Don't want to answer  Value = -8.0 Label = Don't know  Value = -1.0 Label = Not applicable |
| FCOTWI00 | When CM goes out, how often do parents know who with? | mcs6_cm_interview.sav | "" |
| FCOUTW00 | When CM goes out, how often do parents know where? | mcs6_cm_interview.sav | Value = 1.0 Label = Always  Value = 2.0 Label = Usually Value = 3.0 Label = Sometimes  Value = 4.0 Label = Never  Value = -9.0 Label = Dont want to answer  Value = -8.0 Label = Dont know  Value = -1.0 Label = Not applicable |
| FCPAAB00 | Does your natural father live with you? | mcs6_cm_interview.sav | Value = 1.0 Label = Yes  Value = 2.0 Label = No  Value = -9.0 Label = Don't want to answer  Value = -8.0 Label = Don't know  Value = -1.0 Label = Not applicable |
| FCPCKP00 | How often CM hurts or picks on other children | mcs6_cm_interview.sav | Value = 1.0 Label = Most days  Value = 2.0 Label = About once a week  Value = 3.0 Label = About once a month  Value = 4.0 Label = Every few months  Value = 5.0 Label = Less often  Value = 6.0 Label = Never  Value = -9.0 Label = Don't want to answer  Value = -8.0 Label = Don't know  Value = -1.0 Label = Not applicable |
| FCPETR00 | How many of your close friends get into a lot of trouble at school? | mcs6_cm_interview.sav | Value = 1.0 Label = All of them  Value = 2.0 Label = Most of them  Value = 3.0 Label = Some of them  Value = 4.0 Label = None of them  Value = -9.0 Label = Don't want to answer  Value = -8.0 Label = Don't know  Value = -1.0 Label = Not applicable |
| FCPHEX00 | Days last week spent doing moderate to vigorous physical activity | mcs6_cm_interview.sav | Value = 1.0 Label = Every day  Value = 2.0 Label = 5-6 days  Value = 3.0 Label = 3-4 days  Value = 4.0 Label = 1-2 days  Value = 5.0 Label = Not at all  Value = -9.0 Label = Dont want to answer  Value = -8.0 Label = Dont know  Value = -1.0 Label = Not applicable |
| FCPLAB00 | ConsumAttGrid: I like clothing with popular labels | mcs6_cm_interview.sav | Value = 1.0 Label = Strongly agree  Value = 2.0 Label = Agree  Value = 3.0 Label = Disagree  Value = 4.0 Label = Strongly disagree  Value = -9.0 Label = Don't want to answer  Value = -8.0 Label = Don't know  Value = -1.0 Label = Not applicable |
| FCPLWE00 | Do you allow unsupervised time outside home with frds (on weekends) | mcs6_cm_interview.sav | Value = 1.0 Label = Most weekends  Value = 2.0 Label = At least once a month  Value = 3.0 Label = Less often than once a month  Value = 4.0 Label = Never  Value = -9.0 Label = Don't want to answer  Value = -8.0 Label = Don't know  Value = -1.0 Label = Not applicable |
| FCPLWK00 | Do you allow unsupervised time outside home with frds (afternoon after school) | mcs6_cm_interview.sav | Value = 1.0 Label = Most days  Value = 2.0 Label = At least once a week  Value = 3.0 Label = At least once a month  Value = 4.0 Label = Less often than once a month  Value = 5.0 Label = Never  Value = -9.0 Label = Dont want to answer  Value = -8.0 Label = Dont know  Value = -1.0 Label = Not applicable |
| FCPOLS00 | Has CM been stopped or questioned by police | mcs6_cm_interview.sav | Value = 1.0 Label = Yes  Value = 2.0 Label = No  Value = -9.0 Label = Don't want to answer  Value = -8.0 Label = Don't know  Value = -1.0 Label = Not applicable |
| FCPTNT00 | How patient is CM (*) | mcs6_cm_interview.sav | Value = 0.0 Label = Never  Value = -9.0 Label = Don't want to answer  Value = -8.0 Label = Don't know  Value = 10.0 Label = Always  Value = -1.0 Label = Not applicable |
| FCPUHG00 | CM growth spurt | mcs6_cm_interview.sav | Value = 1.0 Label = My growth spurt has not yet begun  Value = 2.0 Label = My growth spurt has barely started  Value = 3.0 Label = My growth spurt has definitely started  Value = 4.0 Label = My growth spurt seems completed Value = -9.0 Label = Dont want to answer  Value = -8.0 Label = Dont know  Value = -1.0 Label = Not applicable |
| FCQTRM00 | Quiet area where CM is able to do homework | mcs6_cm_interview.sav | Value = 1.0 Label = Yes  Value = 2.0 Label = No  Value = -9.0 Label = Dont want to answer  Value = -8.0 Label = Dont know  Value = -1.0 Label = Not applicable |
| FCQUAF00 | How often does CM argue with father | mcs6_cm_interview.sav | Value = 1.0 Label = Most days  Value = 2.0 Label = More than once a week  Value = 3.0 Label = Less than once a week  Value = 4.0 Label = Hardly ever  Value = 5.0 Label = Never  Value = -9.0 Label = Don't want to answer  Value = -8.0 Label = Don't know  Value = -1.0 Label = Not applicable |
| FCQUAM00 | How often does CM argue with mother | mcs6_cm_interview.sav | Value = 1.0 Label = Most days  Value = 2.0 Label = More than once a week  Value = 3.0 Label = Less than once a week  Value = 4.0 Label = Hardly ever  Value = 5.0 Label = Never  Value = -9.0 Label = Dont want to answer  Value = -8.0 Label = Dont know  Value = -1.0 Label = Not applicable |
| FCRISK00 | How willing is CM to take risks (*) | mcs6_cm_interview.sav | Value = 0.0 Label = Never  Value = -9.0 Label = Dont want to answer  Value = -8.0 Label = Dont know  Value = 10.0 Label = Always  Value = -1.0 Label = Not applicable |
| FCRJOY00 | ActivGrid: Read for enjoyment (not for school)? | mcs6_cm_interview.sav | Value = 1.0 Label = Most days  Value = 2.0 Label = At least once a week  Value = 3.0 Label = At least once a month  Value = 4.0 Label = Several times a year  Value = 5.0 Label = Once a year or less  Value = 6.0 Label = Never or almost never  Value = -9.0 Label = Don't want to answer  Value = -8.0 Label = Don't know  Value = -1.0 Label = Not applicable |
| FCRLQF00 | How close is CM with father | mcs6_cm_interview.sav | Value = 1.0 Label = Not very close  Value = 2.0 Label = Fairly close  Value = 3.0 Label = Very close  Value = 4.0 Label = Extremely close Value = 5.0 Label = I don’t have a father/I am not in contact my father Value = -9.0 Label = Don't want to answer  Value = -8.0 Label = Don't know  Value = -1.0 Label = Not applicable |
| FCRLQM00 | How close is CM with mother | mcs6_cm_interview.sav | Value = 1.0 Label = Not very close  Value = 2.0 Label = Fairly close  Value = 3.0 Label = Very close  Value = 4.0 Label = Extremely close Value = 5.0 Label = I don’t have a mother/I am not in contact with my mother Value = -9.0 Label = Dont want to answer  Value = -8.0 Label = Dont know  Value = -1.0 Label = Not applicable |
| FCRLSV00 | ActivGrid: Attend a religious service? | mcs6_cm_interview.sav | Value = 1.0 Label = Most days  Value = 2.0 Label = At least once a week  Value = 3.0 Label = At least once a month  Value = 4.0 Label = Several times a year  Value = 5.0 Label = Once a year or less  Value = 6.0 Label = Never or almost never  Value = -9.0 Label = Don't want to answer  Value = -8.0 Label = Don't know  Value = -1.0 Label = Not applicable |
| FCROBH00 | Has CM ever entered someones home to steal or damage something | mcs6_cm_interview.sav | Value = 1.0 Label = Yes  Value = 2.0 Label = No  Value = -9.0 Label = Don't want to answer  Value = -8.0 Label = Don't know  Value = -1.0 Label = Not applicable |
| FCROLE00 | GenderRolesGrid: Men and women should do the same jobs around the house | mcs6_cm_interview.sav | Value = 1.0 Label = Strongly agree  Value = 2.0 Label = Agree  Value = 3.0 Label = Disagree  Value = 4.0 Label = Strongly disagree  Value = -9.0 Label = Dont want to answer  Value = -8.0 Label = Dont know  Value = -1.0 Label = Not applicable |
| FCROMB00 | Has CM ever been attracted to a male | mcs6_cm_interview.sav | Value = 1.0 Label = Yes  Value = 2.0 Label = No  Value = -9.0 Label = Don't want to answer  Value = -8.0 Label = Don't know  Value = -1.0 Label = Not applicable |
| FCROMG00 | Has CM ever been attracted to a female | mcs6_cm_interview.sav | "" |
| FCRUDE00 | Past 12 months: freq of CM been complained for rude/noisy in public? | mcs6_cm_interview.sav | Value = 1.0 Label = Yes  Value = 2.0 Label = No  Value = -9.0 Label = Dont want to answer  Value = -8.0 Label = Dont know  Value = -1.0 Label = Not applicable |
| FCSAFD00 | Area safety: safe for CM to walk/play etc within a mile/20 min from home | mcs6_cm_interview.sav | Value = 1.0 Label = Very safe  Value = 2.0 Label = Safe  Value = 3.0 Label = Not very safe  Value = 4.0 Label = Not at all safe Value = -9.0 Label = Dont want to answer  Value = -8.0 Label = Dont know  Value = -1.0 Label = Not applicable |
| FCSAFF00 | SocSupGrid: I have family and friends who help me feel safe, secure and happy. | mcs6_cm_interview.sav | Value = 1.0 Label = Very true  Value = 2.0 Label = Partly true  Value = 3.0 Label = Not true at all Value = -9.0 Label = Dont want to answer  Value = -8.0 Label = Dont know  Value = -1.0 Label = Not applicable |
| FCSATI00 | RosenbergGrid: On the whole, I am satisfied with myself | mcs6_cm_interview.sav | Value = 1.0 Label = Strongly agree  Value = 2.0 Label = Agree  Value = 3.0 Label = Disagree  Value = 4.0 Label = Strongly disagree  Value = -9.0 Label = Dont want to answer  Value = -8.0 Label = Dont know  Value = -1.0 Label = Not applicable |
| FCSCBE00 | EducMotGrid: How often do you try your best at school? | mcs6_cm_interview.sav | Value = 1.0 Label = All of the time Value = 2.0 Label = Most of the time  Value = 3.0 Label = Some of the time  Value = 4.0 Label = Never  Value = -9.0 Label = Dont want to answer  Value = -8.0 Label = Dont know  Value = -1.0 Label = Not applicable |
| FCSCHL00 | WellbeingGrid: How happy is CM with school (*) | mcs6_cm_interview.sav | Value = 1.0 Label = Completely happy  Value = 7.0 Label = Not at all happy  Value = -8.0 Label = Don't know  Value = -9.0 Label = Don't want to answer  Value = -1.0 Label = Not applicable |
| FCSCWA00 | EducMotGrid: How often do you feel school is a waste of time? | mcs6_cm_interview.sav | Value = 1.0 Label = All of the time Value = 2.0 Label = Most of the time  Value = 3.0 Label = Some of the time  Value = 4.0 Label = Never  Value = -9.0 Label = Don't want to answer  Value = -8.0 Label = Don't know  Value = -1.0 Label = Not applicable |
| FCSCWK00 | WellbeingGrid: How happy is CM with school work (*) | mcs6_cm_interview.sav | Value = 1.0 Label = Completely happy  Value = 7.0 Label = Not at all happy  Value = -8.0 Label = Dont know  Value = -9.0 Label = Dont want to answer  Value = -1.0 Label = Not applicable |
| FCSINT00 | EducMotGrid: How often do you find school interesting? | mcs6_cm_interview.sav | Value = 1.0 Label = All of the time Value = 2.0 Label = Most of the time  Value = 3.0 Label = Some of the time  Value = 4.0 Label = Never  Value = -9.0 Label = Don't want to answer  Value = -8.0 Label = Don't know  Value = -1.0 Label = Not applicable |
| FCSLLN00 | During the last 4 weeks how long does going to sleep usually take | mcs6_cm_interview.sav | Value = 1.0 Label = 0-15 minutes  Value = 2.0 Label = 16-30 minutes  Value = 3.0 Label = 31-45 minutes  Value = 4.0 Label = 46-60 minutes  Value = 5.0 Label = More than 60 minutes  Value = -9.0 Label = Dont want to answer  Value = -8.0 Label = Dont know  Value = -1.0 Label = Not applicable |
| FCSLTR00 | During the last 4 weeks how often did CM awaken during sleep | mcs6_cm_interview.sav | Value = 1.0 Label = All of the time Value = 2.0 Label = Most of the time  Value = 3.0 Label = A good bit of the time  Value = 4.0 Label = Some of the time  Value = 5.0 Label = A little of the time  Value = 6.0 Label = None of the time  Value = -9.0 Label = Dont want to answer  Value = -8.0 Label = Dont know  Value = -1.0 Label = Not applicable |
| FCSLWE00 | Time CM goes to sleep when there is no school the next day | mcs6_cm_interview.sav | Value = 1.0 Label = Before 9pm  Value = 2.0 Label = 9 - 9:59pm  Value = 3.0 Label = 10 - 10:59pm  Value = 4.0 Label = 11 - midnight  Value = 5.0 Label = After midnight  Value = -9.0 Label = Dont want to answer  Value = -8.0 Label = Dont know  Value = -1.0 Label = Not applicable |
| FCSLWK00 | Time CM goes to sleep on a school night | mcs6_cm_interview.sav | Value = 1.0 Label = Before 9pm  Value = 2.0 Label = 9 - 9:59pm  Value = 3.0 Label = 10 - 10:59pm  Value = 4.0 Label = 11 - midnight  Value = 5.0 Label = After midnight  Value = -9.0 Label = Dont want to answer  Value = -8.0 Label = Dont know  Value = -1.0 Label = Not applicable |
| FCSMFR00 | How often CMs friends smoke cigarettes | mcs6_cm_interview.sav | Value = 1.0 Label = None of them  Value = 2.0 Label = Some of them  Value = 3.0 Label = Most of them  Value = 4.0 Label = All of them  Value = -9.0 Label = Dont want to answer  Value = -8.0 Label = Dont know  Value = -1.0 Label = Not applicable |
| FCSMOK00 | How often CM smokes cigarettes | mcs6_cm_interview.sav | Value = 1.0 Label = I have never smoked cigarettes  Value = 2.0 Label = I have only ever tried smoking cigarettes once Value = 3.0 Label = I used to smoke sometimes but I never smoke a cigarette now Value = 4.0 Label = I sometimes smoke cigarettes now but I don’t smoke as many as one a week Value = 5.0 Label = I usually smoke between one and six cigarettes a week Value = 6.0 Label = I usually smoke more than six cigarettes a week Value = -9.0 Label = Dont want to answer  Value = -8.0 Label = Dont know  Value = -1.0 Label = Not applicable |
| FCSOME00 | Hours per week spent on social networking sites | mcs6_cm_interview.sav | Value = 1.0 Label = None  Value = 2.0 Label = Less than half an hour  Value = 3.0 Label = Half an hour to less than 1 hour  Value = 4.0 Label = 1 hour to less than 2 hours  Value = 5.0 Label = 2 hours to less than 3 hours  Value = 6.0 Label = 3 hours to less than 5 hours  Value = 7.0 Label = 5 hours to less than 7 hours  Value = 8.0 Label = 7 hours or more Value = -9.0 Label = Don't want to answer  Value = -8.0 Label = Don't know  Value = -1.0 Label = Not applicable |
| FCSPNT00 | Wrong to write or spray paint on building/fence etc | mcs6_cm_interview.sav | Value = 1.0 Label = Very wrong  Value = 2.0 Label = A bit wrong  Value = 3.0 Label = Not wrong  Value = -9.0 Label = Don't want to answer  Value = -8.0 Label = Don't know  Value = -1.0 Label = Not applicable |
| FCSPOR00 | ActivGrid: Go to watch live sport? | mcs6_cm_interview.sav | Value = 1.0 Label = Most days  Value = 2.0 Label = At least once a week  Value = 3.0 Label = At least once a month  Value = 4.0 Label = Several times a year  Value = 5.0 Label = Once a year or less  Value = 6.0 Label = Never or almost never  Value = -9.0 Label = Don't want to answer  Value = -8.0 Label = Don't know  Value = -1.0 Label = Not applicable |
| FCSPRY00 | Past 12 months: has CM written/spray painted somewhere they shouldnt | mcs6_cm_interview.sav | Value = 1.0 Label = Yes  Value = 2.0 Label = No  Value = -9.0 Label = Dont want to answer  Value = -8.0 Label = Dont know  Value = -1.0 Label = Not applicable |
| FCSTEL00 | Wrong to take things without paying | mcs6_cm_interview.sav | Value = 1.0 Label = Very wrong  Value = 2.0 Label = A bit wrong  Value = 3.0 Label = Not wrong  Value = -9.0 Label = Don't want to answer  Value = -8.0 Label = Don't know  Value = -1.0 Label = Not applicable |
| FCSTFR0A | When not at school, how often do you spend time with your close friends? | mcs6_cm_interview.sav | Value = 1.0 Label = Most days  Value = 2.0 Label = At least once a week  Value = 3.0 Label = At least once month  Value = 4.0 Label = Less often than once a month  Value = 5.0 Label = Never  Value = -9.0 Label = Dont want to answer  Value = -8.0 Label = Dont know  Value = -1.0 Label = Not applicable |
| FCSTIR00 | EducMotGrid: How often do you get tired at school? | mcs6_cm_interview.sav | Value = 1.0 Label = All of the time Value = 2.0 Label = Most of the time  Value = 3.0 Label = Some of the time  Value = 4.0 Label = Never  Value = -9.0 Label = Don't want to answer  Value = -8.0 Label = Don't know  Value = -1.0 Label = Not applicable |
| FCSTLN00 | ASBOgrid: CM stolen something from someone eg mobile phone, money | mcs6_cm_interview.sav | Value = 1.0 Label = Yes  Value = 2.0 Label = No  Value = -9.0 Label = Don't want to answer  Value = -8.0 Label = Don't know  Value = -1.0 Label = Not applicable |
| FCSTNT00 | Past month: freq of CM staying out (9pm+) without Parent knowing | mcs6_cm_interview.sav | Value = 1.0 Label = Never  Value = 2.0 Label = 1-2 times  Value = 3.0 Label = 3-9 times  Value = 4.0 Label = 10 or more times  Value = -9.0 Label = Dont want to answer  Value = -8.0 Label = Dont know  Value = -1.0 Label = Not applicable |
| FCSTOL00 | Past 12months: freq of CM taken something from a shop without paying | mcs6_cm_interview.sav | Value = 1.0 Label = Yes  Value = 2.0 Label = No  Value = -9.0 Label = Dont want to answer  Value = -8.0 Label = Dont know  Value = -1.0 Label = Not applicable |
| FCSTYU00 | How likely is it CM will go to university? (Scale 0-100%) (*) | mcs6_cm_interview.sav | Value = -8.0 Label = Don't know  Value = -1.0 Label = Not applicable  Value = -9.0 Label = Don't want to answer |
| FCSTYY00 | How likely is it CM will remain in education at the end of year 11? (*) | mcs6_cm_interview.sav | Value = -8.0 Label = Dont know  Value = -1.0 Label = Not applicable  Value = -9.0 Label = Dont want to answer |
| FCSUNH00 | EducMotGrid: How often do you feel unhappy at school? | mcs6_cm_interview.sav | Value = 1.0 Label = All of the time Value = 2.0 Label = Most of the time  Value = 3.0 Label = Some of the time  Value = 4.0 Label = Never  Value = -9.0 Label = Don't want to answer  Value = -8.0 Label = Don't know  Value = -1.0 Label = Not applicable |
| FCTKWY00 | How often does CM eat fast food | mcs6_cm_interview.sav | Value = 1.0 Label = More than once a day  Value = 2.0 Label = Once a day  Value = 3.0 Label = 3-6 days a week Value = 4.0 Label = 1-2 days a week Value = 5.0 Label = Less often but at least once a month  Value = 6.0 Label = Less than once a month  Value = 7.0 Label = Never  Value = -9.0 Label = Dont want to answer  Value = -8.0 Label = Dont know  Value = -1.0 Label = Not applicable |
| FCTRSS00 | SocSupGrid: There is someone I trust whom I would turn to if I had problems | mcs6_cm_interview.sav | Value = 1.0 Label = Very true  Value = 2.0 Label = Partly true  Value = 3.0 Label = Not true at all Value = -9.0 Label = Don't want to answer  Value = -8.0 Label = Don't know  Value = -1.0 Label = Not applicable |
| FCTRST0A | How much does CM trust others (*) | mcs6_cm_interview.sav | Value = 0.0 Label = Not at all  Value = -9.0 Label = Dont want to answer  Value = -8.0 Label = Dont know  Value = 10.0 Label = Completely  Value = -1.0 Label = Not applicable |
| FCTRUA00 | Has CM missed school without parents permission | mcs6_cm_interview.sav | Value = 1.0 Label = Yes  Value = 2.0 Label = No  Value = -9.0 Label = Don't want to answer  Value = -8.0 Label = Don't know  Value = -1.0 Label = Not applicable |
| FCTVHO00 | Hours per WEEKDAY spent watching TV or videos on computer | mcs6_cm_interview.sav | Value = 1.0 Label = None  Value = 2.0 Label = Less than half an hour  Value = 3.0 Label = Half an hour to less than 1 hour  Value = 4.0 Label = 1 hour to less than 2 hours  Value = 5.0 Label = 2 hours to less than 3 hours  Value = 6.0 Label = 3 hours to less than 5 hours  Value = 7.0 Label = 5 hours to less than 7 hours  Value = 8.0 Label = 7 hours or more Value = -9.0 Label = Dont want to answer  Value = -8.0 Label = Dont know  Value = -1.0 Label = Not applicable |
| FCVALU00 | RosenbergGrid: I am a person of value | mcs6_cm_interview.sav | Value = 1.0 Label = Strongly agree  Value = 2.0 Label = Agree  Value = 3.0 Label = Disagree  Value = 4.0 Label = Strongly disagree  Value = -9.0 Label = Don't want to answer  Value = -8.0 Label = Don't know  Value = -1.0 Label = Not applicable |
| FCVEGI00 | How often CM eats at least 2 portions of vegetables | mcs6_cm_interview.sav | Value = 1.0 Label = Never  Value = 2.0 Label = Some days, but not all days  Value = 3.0 Label = Every day  Value = -9.0 Label = Don't want to answer  Value = -8.0 Label = Don't know  Value = -1.0 Label = Not applicable |
| FCVICA00 | VictimisGrid: been physically violent towards CM | mcs6_cm_interview.sav | Value = 1.0 Label = Yes  Value = 2.0 Label = No  Value = -9.0 Label = Don't want to answer  Value = -8.0 Label = Don't know  Value = -1.0 Label = Not applicable |
| FCVICC00 | VictimisGrid: hit or used a weapon against CM | mcs6_cm_interview.sav | "" |
| FCVICE00 | VictimisGrid: stolen something from CM | mcs6_cm_interview.sav | "" |
| FCVICF0A | VictimisGrid: sexually assaulted CM | mcs6_cm_interview.sav | "" |
| FCVICG00 | VictimisGrid: CM insulted, threatened, shouted at | mcs6_cm_interview.sav | Value = 1.0 Label = Yes  Value = 2.0 Label = No  Value = -9.0 Label = Dont want to answer  Value = -8.0 Label = Dont know  Value = -1.0 Label = Not applicable |
| FCVIRS00 | Past 12 months: has CM sent viruses to damage/infect other computers | mcs6_cm_interview.sav | Value = 1.0 Label = Yes  Value = 2.0 Label = No  Value = -9.0 Label = Don't want to answer  Value = -8.0 Label = Don't know  Value = -1.0 Label = Not applicable |
| FCWEGT00 | CMs perception of their weight | mcs6_cm_interview.sav | Value = 1.0 Label = Underweight  Value = 2.0 Label = About the right weight  Value = 3.0 Label = Slightly overweight  Value = 4.0 Label = Very overweight Value = -9.0 Label = Dont want to answer  Value = -8.0 Label = Dont know  Value = -1.0 Label = Not applicable |
| FCWELK00 | MoralAttGrid: How important is it to you to be well liked? | mcs6_cm_interview.sav | Value = 1.0 Label = Very important  Value = 2.0 Label = Quite important Value = 3.0 Label = Not very important  Value = 4.0 Label = Not at all important  Value = -9.0 Label = Dont want to answer  Value = -8.0 Label = Dont know  Value = -1.0 Label = Not applicable |
| FCWEPN00 | ASBOgrid: CM Used or hit someone with a weapon? | mcs6_cm_interview.sav | Value = 1.0 Label = Yes  Value = 2.0 Label = No  Value = -9.0 Label = Don't want to answer  Value = -8.0 Label = Don't know  Value = -1.0 Label = Not applicable |
| FCWHRD00 | MoralAttGrid: How important is it to you to work hard? | mcs6_cm_interview.sav | Value = 1.0 Label = Very important  Value = 2.0 Label = Quite important Value = 3.0 Label = Not very important  Value = 4.0 Label = Not at all important  Value = -9.0 Label = Don't want to answer  Value = -8.0 Label = Don't know  Value = -1.0 Label = Not applicable |
| FCWMON0A | Where CM gets spending money from MC (A) [Regular pocket money/allowance] | mcs6_cm_interview.sav | Value = 0.0 Label = No  Value = 1.0 Label = Yes  Value = -1.0 Label = Not applicable |
| FCWMON0B | Where CM gets spending money from MC (A) [Chores/babysitting] | mcs6_cm_interview.sav | "" |
| FCWMON0C | Where CM gets spending money from MC (A) [Working in the family business] | mcs6_cm_interview.sav | "" |
| FCWMON0D | Where CM gets spending money from MC (A) [Paid job] | mcs6_cm_interview.sav | "" |
| FCWMON0E | Where CM gets spending money from MC (A) [Parents given when CM needs] | mcs6_cm_interview.sav | "" |
| FCWMON0F | Where CM gets spending money from MC (A) [Other] | mcs6_cm_interview.sav | "" |
| FCWMON0G | Where CM gets spending money from MC (A) [Never get any money to spend] | mcs6_cm_interview.sav | "" |
| FCWMON0L | Where CM gets spending money from MC (A) [Money from friends/relatives] | mcs6_cm_interview.sav | "" |
| FCWMON0M | Where CM gets spending money from MC (A) [Money frm spcl occasins BirthD/Xmas] | mcs6_cm_interview.sav | "" |
| FCWMON0N | Where CM gets spending money from MC (A) [Reward for good behaviour/grades] | mcs6_cm_interview.sav | "" |
| FCWMON0O | Where CM gets spending money from MC (A) [Money for school] | mcs6_cm_interview.sav | "" |
| FCWMON0P | Where CM gets spending money from MC (A) [From selling items] | mcs6_cm_interview.sav | "" |
| FCWMON0Q | Where CM gets spending money from MC (A) [Saving] | mcs6_cm_interview.sav | "" |
| FCWMON0R | Where CM gets spending money from MC (A) [Other earnings] | mcs6_cm_interview.sav | "" |
| FCWRRY0A | What do you do if you are worried about something? (Keep it to myself) | mcs6_cm_interview.sav | Value = 0.0 Label = No  Value = 1.0 Label = Yes  Value = -9.0 Label = Dont want to answer  Value = -8.0 Label = Dont know  Value = -1.0 Label = Not applicable |
| FCWUWE00 | Time CM wakes up when there is no school | mcs6_cm_interview.sav | Value = 1.0 Label = Before 8am  Value = 2.0 Label = 8 - 8:59am  Value = 3.0 Label = 9 - 9:59am  Value = 4.0 Label = 10 - 10:59am  Value = 5.0 Label = 11 - 11:59am  Value = 6.0 Label = After Midday  Value = -9.0 Label = Dont want to answer  Value = -8.0 Label = Dont know  Value = -1.0 Label = Not applicable |
| FCWUWK00 | Time CM wakes up on a school day | mcs6_cm_interview.sav | Value = 1.0 Label = Before 6am  Value = 2.0 Label = 6 - 6:59am  Value = 3.0 Label = 7 - 7:59am  Value = 4.0 Label = 8 - 8:59am  Value = 5.0 Label = After 9am  Value = -9.0 Label = Dont want to answer  Value = -8.0 Label = Dont know  Value = -1.0 Label = Not applicable |
| FCWYLK00 | WellbeingGrid: How happy is CM with the way they look (*) | mcs6_cm_interview.sav | Value = 1.0 Label = Completely happy  Value = 7.0 Label = Not at all happy  Value = -8.0 Label = Don't know  Value = -9.0 Label = Don't want to answer  Value = -1.0 Label = Not applicable |

**Table S2.** Rates of missingness for the dataset used in this study

| Percentages of missingness | Number of variables |
| --- | --- |
| >5% | 167 |
| >10% | 20 |
| >15% | 7 |
| >20% | 4 |
| >30% | 0 |

**Table S3.** Variables grouped into conceptual domains.

| **Domains at Age 11** | |
| --- | --- |
| Physical and Derived Measurements | Includes weight, height, body mass index (BMI), body fat percentage, and a derived measurement for obesity. |
| Leisure & Habits | Frequency of activities such as listening to music, drawing, reading for pleasure, playing video games, and internet use. |
| Wellbeing & Emotions | Self-esteem, subjective happiness with self and life, recent emotional states (e.g., sadness, anger, fear), and coping mechanisms when worried. |
| Economic Perception | Pocket money access, perceived family wealth, and material aspirations. |
| Social Life | Friend network composition, interaction frequency, ethnic diversity, and recreational space availability. |
| Behaviour & Beliefs | Externalizing behaviors (e.g., stealing, vandalism), moral judgments, gender role attitudes, substance experimentation, bullying (as perpetrator or victim), and risk perception. |
| School & Future Orientation | School satisfaction, engagement, behavior in class, teacher relationships, and future academic aspirations. |
| **Domains at Age 14** | |
| Physical Measurements | Body weight, height, and body fat percentage. |
| Intimate Relationships | Experience with romantic or intimate behaviors and feelings of attraction. |
| Health & Lifestyle | General health, diet, physical activity, sleep habits, use of health-related devices (e.g., pacemaker), and chronic health conditions. |
| Behaviour & Attitudes | Rule-breaking behavior, substance use, moral norms, gender roles, victimization, school misbehavior, online conduct, and legal interactions. |
| Leisure & Habits | Participation in cultural, religious, and recreational activities, as well as time spent online or watching media. |
| Economic Perception | Access to personal spending money and sources thereof, attitudes toward consumer goods. |
| Wellbeing & Emotions | Recent affective states, self-perception, life satisfaction, perceived social support, and trust in others. |
| Family & Peer Relationships | Household structure, parental supervision, quality of parent-child and peer relationships, and availability of support at home. |
| School Engagement | Academic motivation, school satisfaction, homework environment, educational expectations, and emotional experience at school. |
| **Age-Independent Domains** | |
| Parental Health | Self-reported physical and mental health of caregivers, substance use, and chronic illness history. |
| Sociodemographic Background | Participant sex, ethnicity, age at interview to nearest 10th of year, and indicators of household socioeconomic status across multiple waves. |
| Cognitive & Birth Characteristics | Early developmental milestones, birth weight, complications during pregnancy or birth, and early health concerns. |

**Table S4.** Median correlation and Interquartile Ranges (IQR) within and between domains. At age 11, domains include physical measurements (e.g., weight, height, BMI), leisure activities, wellbeing and emotions, economic perception, social life, behaviour and beliefs, school engagement and future orientation. At age 14, domains cover physical measurements, intimate relationships, health and lifestyle, behaviour and attitudes, leisure, economic perception, wellbeing, family and peer relationships, and school engagement. Age-independent domains include early cognitive and birth characteristics, parental health and sociodemographic background.

| Domain1 | Domain2 | Median Correlation | IQR |
| --- | --- | --- | --- |
| Physical measurements at age 11 | Physical measurements at age 11 | 0.813551786 | 0.519301197 |
| Physical measurements at age 11 | Leisure & Habits at age 11 | 0.075057149 | 0.034904061 |
| Physical measurements at age 11 | Wellbeing & Emotions at age 11 | 0.057012392 | 0.068846633 |
| Physical measurements at age 11 | Economic perception at age 11 | 0.069226087 | 0.021839303 |
| Physical measurements at age 11 | Social Life at age 11 | 0.080313378 | 0.044986877 |
| Physical measurements at age 11 | Behaviour & Beliefs at age 11 | 0.063123257 | 0.057540584 |
| Physical measurements at age 11 | School & Future at age 11 | 0.043551083 | 0.060189176 |
| Physical measurements at age 11 | Physical measurements at age 14 | 0.681473639 | 0.430477654 |
| Physical measurements at age 11 | Intimate Relationships at age 14 | 0.052095245 | 0.090721873 |
| Physical measurements at age 11 | Health & Lifestyle at age 14 | 0.091570206 | 0.108027298 |
| Physical measurements at age 11 | Behaviour & Attitudes at age 14 | 0.034755137 | 0.050729923 |
| Physical measurements at age 11 | Leisure & Habits at age 14 | 0.088370048 | 0.05959984 |
| Physical measurements at age 11 | Economic & Perception at age 14 | 0.029832472 | 0.046514546 |
| Physical measurements at age 11 | Wellbeing & Emotions at age 14 | 0.101513004 | 0.0694804 |
| Physical measurements at age 11 | Family & Peer Relationships at age 14 | 0.065022138 | 0.049598871 |
| Physical measurements at age 11 | School at age 14 | 0.067900464 | 0.040136484 |
| Physical measurements at age 11 | Cognitive & Birth | 0.043356224 | 0.051473173 |
| Physical measurements at age 11 | Parent's health | 0.052354679 | 0.055674137 |
| Physical measurements at age 11 | Sociodemographic | 0.028236294 | 0.046178267 |
| Leisure & Habits at age 11 | Leisure & Habits at age 11 | 0.081305251 | 0.057479996 |
| Leisure & Habits at age 11 | Wellbeing & Emotions at age 11 | 0.047003773 | 0.079865608 |
| Leisure & Habits at age 11 | Economic perception at age 11 | 0.057568857 | 0.041500891 |
| Leisure & Habits at age 11 | Social Life at age 11 | 0.065072178 | 0.036901593 |
| Leisure & Habits at age 11 | Behaviour & Beliefs at age 11 | 0.034583051 | 0.062721696 |
| Leisure & Habits at age 11 | School & Future at age 11 | 0.046711486 | 0.076939999 |
| Leisure & Habits at age 11 | Physical measurements at age 14 | 0.093281737 | 0.058456594 |
| Leisure & Habits at age 11 | Intimate Relationships at age 14 | 0.074758068 | 0.11703156 |
| Leisure & Habits at age 11 | Health & Lifestyle at age 14 | 0.033310277 | 0.065816541 |
| Leisure & Habits at age 11 | Behaviour & Attitudes at age 14 | 0.030544654 | 0.069774984 |
| Leisure & Habits at age 11 | Leisure & Habits at age 14 | 0.043621754 | 0.061432133 |
| Leisure & Habits at age 11 | Economic & Perception at age 14 | 0.033997535 | 0.068194247 |
| Leisure & Habits at age 11 | Wellbeing & Emotions at age 14 | 0.047026999 | 0.074632584 |
| Leisure & Habits at age 11 | Family & Peer Relationships at age 14 | 0.032948271 | 0.065117779 |
| Leisure & Habits at age 11 | School at age 14 | 0.068446439 | 0.069544695 |
| Leisure & Habits at age 11 | Cognitive & Birth | 0 | 0.062340267 |
| Leisure & Habits at age 11 | Parent's health | 0.042358231 | 0.072427231 |
| Leisure & Habits at age 11 | Sociodemographic | 0.07519715 | 0.048646822 |
| Wellbeing & Emotions at age 11 | Wellbeing & Emotions at age 11 | 0.091929886 | 0.120002301 |
| Wellbeing & Emotions at age 11 | Economic perception at age 11 | 0.074527691 | 0.0742834 |
| Wellbeing & Emotions at age 11 | Social Life at age 11 | 0.067330114 | 0.070842108 |
| Wellbeing & Emotions at age 11 | Behaviour & Beliefs at age 11 | 0.061130035 | 0.080341102 |
| Wellbeing & Emotions at age 11 | School & Future at age 11 | 0.059392355 | 0.108964378 |
| Wellbeing & Emotions at age 11 | Physical measurements at age 14 | 0.069761035 | 0.063195311 |
| Wellbeing & Emotions at age 11 | Intimate Relationships at age 14 | 0.020925167 | 0.078340361 |
| Wellbeing & Emotions at age 11 | Health & Lifestyle at age 14 | 0.032407894 | 0.067880006 |
| Wellbeing & Emotions at age 11 | Behaviour & Attitudes at age 14 | 0.02380481 | 0.068352284 |
| Wellbeing & Emotions at age 11 | Leisure & Habits at age 14 | 0.040983644 | 0.078385653 |
| Wellbeing & Emotions at age 11 | Economic & Perception at age 14 | 0 | 0.044838693 |
| Wellbeing & Emotions at age 11 | Wellbeing & Emotions at age 14 | 0.06468651 | 0.086098551 |
| Wellbeing & Emotions at age 11 | Family & Peer Relationships at age 14 | 0.039490696 | 0.076953233 |
| Wellbeing & Emotions at age 11 | School at age 14 | 0.054705616 | 0.072369664 |
| Wellbeing & Emotions at age 11 | Cognitive & Birth | 0.020528528 | 0.058762407 |
| Wellbeing & Emotions at age 11 | Parent's health | 0.010880045 | 0.051241548 |
| Wellbeing & Emotions at age 11 | Sociodemographic | 0.039074259 | 0.076485437 |
| Economic perception at age 11 | Economic perception at age 11 | 0.08225797 | 0.107378214 |
| Economic perception at age 11 | Social Life at age 11 | 0.07525495 | 0.052607202 |
| Economic perception at age 11 | Behaviour & Beliefs at age 11 | 0.057273011 | 0.092712399 |
| Economic perception at age 11 | School & Future at age 11 | 0.057411364 | 0.095855265 |
| Economic perception at age 11 | Physical measurements at age 14 | 0.064317904 | 0.03582213 |
| Economic perception at age 11 | Intimate Relationships at age 14 | 0.029229018 | 0.0796053 |
| Economic perception at age 11 | Health & Lifestyle at age 14 | 0 | 0.047941631 |
| Economic perception at age 11 | Behaviour & Attitudes at age 14 | 0.034054192 | 0.070301571 |
| Economic perception at age 11 | Leisure & Habits at age 14 | 0.021993383 | 0.066703726 |
| Economic perception at age 11 | Economic & Perception at age 14 | 0 | 0.046505653 |
| Economic perception at age 11 | Wellbeing & Emotions at age 14 | 0.048625622 | 0.072387284 |
| Economic perception at age 11 | Family & Peer Relationships at age 14 | 0.034463508 | 0.066010805 |
| Economic perception at age 11 | School at age 14 | 0.060014363 | 0.064986186 |
| Economic perception at age 11 | Cognitive & Birth | 0 | 0.045856769 |
| Economic perception at age 11 | Parent's health | 0.024300389 | 0.054273336 |
| Economic perception at age 11 | Sociodemographic | 0.07103249 | 0.060119875 |
| Social Life at age 11 | Social Life at age 11 | 0.323360107 | 0.339640118 |
| Social Life at age 11 | Behaviour & Beliefs at age 11 | 0.043371096 | 0.074342483 |
| Social Life at age 11 | School & Future at age 11 | 0.043824896 | 0.087486091 |
| Social Life at age 11 | Physical measurements at age 14 | 0.093084327 | 0.05536044 |
| Social Life at age 11 | Intimate Relationships at age 14 | 0.079352289 | 0.115299041 |
| Social Life at age 11 | Health & Lifestyle at age 14 | 0.018408753 | 0.06446619 |
| Social Life at age 11 | Behaviour & Attitudes at age 14 | 0.041264104 | 0.072457643 |
| Social Life at age 11 | Leisure & Habits at age 14 | 0.045700398 | 0.067252805 |
| Social Life at age 11 | Economic & Perception at age 14 | 0 | 0.043230732 |
| Social Life at age 11 | Wellbeing & Emotions at age 14 | 0.049615763 | 0.079322801 |
| Social Life at age 11 | Family & Peer Relationships at age 14 | 0.048905367 | 0.076419982 |
| Social Life at age 11 | School at age 14 | 0.052909063 | 0.089734102 |
| Social Life at age 11 | Cognitive & Birth | 0 | 0.056592494 |
| Social Life at age 11 | Parent's health | 0.046016748 | 0.07665307 |
| Social Life at age 11 | Sociodemographic | 0.074212828 | 0.048387731 |
| Behaviour & Beliefs at age 11 | Behaviour & Beliefs at age 11 | 0.088595797 | 0.093009083 |
| Behaviour & Beliefs at age 11 | School & Future at age 11 | 0.062874244 | 0.101539699 |
| Behaviour & Beliefs at age 11 | Physical measurements at age 14 | 0.077147544 | 0.054084403 |
| Behaviour & Beliefs at age 11 | Intimate Relationships at age 14 | 0.04008207 | 0.083664791 |
| Behaviour & Beliefs at age 11 | Health & Lifestyle at age 14 | 0.009661984 | 0.057083275 |
| Behaviour & Beliefs at age 11 | Behaviour & Attitudes at age 14 | 0.047768915 | 0.088620018 |
| Behaviour & Beliefs at age 11 | Leisure & Habits at age 14 | 0.030648742 | 0.061330069 |
| Behaviour & Beliefs at age 11 | Economic & Perception at age 14 | 0 | 0.039379261 |
| Behaviour & Beliefs at age 11 | Wellbeing & Emotions at age 14 | 0.041464965 | 0.072839279 |
| Behaviour & Beliefs at age 11 | Family & Peer Relationships at age 14 | 0.037174699 | 0.071357476 |
| Behaviour & Beliefs at age 11 | School at age 14 | 0.056555761 | 0.064474712 |
| Behaviour & Beliefs at age 11 | Cognitive & Birth | 0 | 0.055586106 |
| Behaviour & Beliefs at age 11 | Parent's health | 0.016865874 | 0.061696805 |
| Behaviour & Beliefs at age 11 | Sociodemographic | 0.070563869 | 0.075137479 |
| School & Future at age 11 | School & Future at age 11 | 0.070256384 | 0.142269356 |
| School & Future at age 11 | Physical measurements at age 14 | 0.051659095 | 0.047638724 |
| School & Future at age 11 | Intimate Relationships at age 14 | 0.023893885 | 0.071198724 |
| School & Future at age 11 | Health & Lifestyle at age 14 | 0.014075652 | 0.060038041 |
| School & Future at age 11 | Behaviour & Attitudes at age 14 | 0.029281756 | 0.072341593 |
| School & Future at age 11 | Leisure & Habits at age 14 | 0.032528795 | 0.077687072 |
| School & Future at age 11 | Economic & Perception at age 14 | 0 | 0.032815854 |
| School & Future at age 11 | Wellbeing & Emotions at age 14 | 0.040524898 | 0.075133339 |
| School & Future at age 11 | Family & Peer Relationships at age 14 | 0.028795642 | 0.067554814 |
| School & Future at age 11 | School at age 14 | 0.069190791 | 0.077585757 |
| School & Future at age 11 | Cognitive & Birth | 0 | 0.050737238 |
| School & Future at age 11 | Parent's health | 0 | 0.054635449 |
| School & Future at age 11 | Sociodemographic | 0.032540985 | 0.076926997 |
| Physical measurements at age 14 | Physical measurements at age 14 | 0.479986347 | 0.596928456 |
| Physical measurements at age 14 | Intimate Relationships at age 14 | 0.036104518 | 0.056649026 |
| Physical measurements at age 14 | Health & Lifestyle at age 14 | 0.082478793 | 0.099073941 |
| Physical measurements at age 14 | Behaviour & Attitudes at age 14 | 0.045793831 | 0.05034484 |
| Physical measurements at age 14 | Leisure & Habits at age 14 | 0.098753598 | 0.068068812 |
| Physical measurements at age 14 | Economic & Perception at age 14 | 0.025901582 | 0.041590204 |
| Physical measurements at age 14 | Wellbeing & Emotions at age 14 | 0.096766129 | 0.091319464 |
| Physical measurements at age 14 | Family & Peer Relationships at age 14 | 0.065932396 | 0.041728093 |
| Physical measurements at age 14 | School at age 14 | 0.070188546 | 0.083035646 |
| Physical measurements at age 14 | Cognitive & Birth | 0.053271334 | 0.055731301 |
| Physical measurements at age 14 | Parent's health | 0.062818313 | 0.059254025 |
| Physical measurements at age 14 | Sociodemographic | 0.042203528 | 0.044700343 |
| Intimate Relationships at age 14 | Intimate Relationships at age 14 | 0.152775155 | 0.382377013 |
| Intimate Relationships at age 14 | Health & Lifestyle at age 14 | 0.070013149 | 0.127393541 |
| Intimate Relationships at age 14 | Behaviour & Attitudes at age 14 | 0.089765305 | 0.136820194 |
| Intimate Relationships at age 14 | Leisure & Habits at age 14 | 0.081723484 | 0.088741066 |
| Intimate Relationships at age 14 | Economic & Perception at age 14 | 0 | 0.029640015 |
| Intimate Relationships at age 14 | Wellbeing & Emotions at age 14 | 0.086456671 | 0.118808607 |
| Intimate Relationships at age 14 | Family & Peer Relationships at age 14 | 0.068480624 | 0.136772203 |
| Intimate Relationships at age 14 | School at age 14 | 0.093613275 | 0.099647774 |
| Intimate Relationships at age 14 | Cognitive & Birth | 0 | 0.055339771 |
| Intimate Relationships at age 14 | Parent's health | 0 | 0.069335371 |
| Intimate Relationships at age 14 | Sociodemographic | 0.009649334 | 0.064302691 |
| Health & Lifestyle at age 14 | Health & Lifestyle at age 14 | 0.059006692 | 0.106459221 |
| Health & Lifestyle at age 14 | Behaviour & Attitudes at age 14 | 0.05306692 | 0.095700369 |
| Health & Lifestyle at age 14 | Leisure & Habits at age 14 | 0.056862559 | 0.090333278 |
| Health & Lifestyle at age 14 | Economic & Perception at age 14 | 0 | 0.053820697 |
| Health & Lifestyle at age 14 | Wellbeing & Emotions at age 14 | 0.079302521 | 0.127745139 |
| Health & Lifestyle at age 14 | Family & Peer Relationships at age 14 | 0.040380621 | 0.078485425 |
| Health & Lifestyle at age 14 | School at age 14 | 0.075614291 | 0.084225229 |
| Health & Lifestyle at age 14 | Cognitive & Birth | 0.013495786 | 0.061073783 |
| Health & Lifestyle at age 14 | Parent's health | 0.030617752 | 0.070544139 |
| Health & Lifestyle at age 14 | Sociodemographic | 0.069031432 | 0.100799703 |
| Behaviour & Attitudes at age 14 | Behaviour & Attitudes at age 14 | 0.107791383 | 0.137802437 |
| Behaviour & Attitudes at age 14 | Leisure & Habits at age 14 | 0.046268 | 0.088997849 |
| Behaviour & Attitudes at age 14 | Economic & Perception at age 14 | 0 | 0.043581443 |
| Behaviour & Attitudes at age 14 | Wellbeing & Emotions at age 14 | 0.072348103 | 0.100997226 |
| Behaviour & Attitudes at age 14 | Family & Peer Relationships at age 14 | 0.066134925 | 0.107194823 |
| Behaviour & Attitudes at age 14 | School at age 14 | 0.101375361 | 0.096034602 |
| Behaviour & Attitudes at age 14 | Cognitive & Birth | 0 | 0.043930918 |
| Behaviour & Attitudes at age 14 | Parent's health | 0.006771467 | 0.062309574 |
| Behaviour & Attitudes at age 14 | Sociodemographic | 0.039405642 | 0.080848927 |
| Leisure & Habits at age 14 | Leisure & Habits at age 14 | 0.062337749 | 0.060952606 |
| Leisure & Habits at age 14 | Economic & Perception at age 14 | 0.007570492 | 0.07313934 |
| Leisure & Habits at age 14 | Wellbeing & Emotions at age 14 | 0.06639198 | 0.07542823 |
| Leisure & Habits at age 14 | Family & Peer Relationships at age 14 | 0.04105991 | 0.080548926 |
| Leisure & Habits at age 14 | School at age 14 | 0.084175057 | 0.078401096 |
| Leisure & Habits at age 14 | Cognitive & Birth | 0.013299925 | 0.066839447 |
| Leisure & Habits at age 14 | Parent's health | 0.04182601 | 0.087554993 |
| Leisure & Habits at age 14 | Sociodemographic | 0.080643718 | 0.082012273 |
| Economic & Perception at age 14 | Economic & Perception at age 14 | 0 | 0 |
| Economic & Perception at age 14 | Wellbeing & Emotions at age 14 | 0 | 0.049877929 |
| Economic & Perception at age 14 | Family & Peer Relationships at age 14 | 0 | 0.057802989 |
| Economic & Perception at age 14 | School at age 14 | 0.02225225 | 0.054379038 |
| Economic & Perception at age 14 | Cognitive & Birth | 0 | 0.026294003 |
| Economic & Perception at age 14 | Parent's health | 0 | 0.019434999 |
| Economic & Perception at age 14 | Sociodemographic | 0 | 0.049058865 |
| Wellbeing & Emotions at age 14 | Wellbeing & Emotions at age 14 | 0.293518978 | 0.258439967 |
| Wellbeing & Emotions at age 14 | Family & Peer Relationships at age 14 | 0.073643018 | 0.10435113 |
| Wellbeing & Emotions at age 14 | School at age 14 | 0.130316203 | 0.128228725 |
| Wellbeing & Emotions at age 14 | Cognitive & Birth | 0.021199524 | 0.051810173 |
| Wellbeing & Emotions at age 14 | Parent's health | 0.023049014 | 0.071030209 |
| Wellbeing & Emotions at age 14 | Sociodemographic | 0.03705471 | 0.075040272 |
| Family & Peer Relationships at age 14 | Family & Peer Relationships at age 14 | 0.066144427 | 0.112772097 |
| Family & Peer Relationships at age 14 | School at age 14 | 0.090756384 | 0.089050892 |
| Family & Peer Relationships at age 14 | Cognitive & Birth | 0 | 0.051976467 |
| Family & Peer Relationships at age 14 | Parent's health | 0.037393738 | 0.072373964 |
| Family & Peer Relationships at age 14 | Sociodemographic | 0.070015971 | 0.087175576 |
| School at age 14 | School at age 14 | 0.191856308 | 0.139295035 |
| School at age 14 | Cognitive & Birth | 0.02616117 | 0.067733147 |
| School at age 14 | Parent's health | 0.034822817 | 0.062560124 |
| School at age 14 | Sociodemographic | 0.074048775 | 0.059738796 |
| Cognitive & Birth | Cognitive & Birth | 0.04452981 | 0.096378935 |
| Cognitive & Birth | Parent's health | 0.022470425 | 0.064394895 |
| Cognitive & Birth | Sociodemographic | 0.019001511 | 0.064409158 |
| Parent's health | Parent's health | 0.098809701 | 0.116156072 |
| Parent's health | Sociodemographic | 0.113857864 | 0.225329356 |
| Sociodemographic | Sociodemographic | 0.270423099 | 0.40535738 |

**Table S5.** The feature selection using mutual information of the best outer fold of the best model (Balanced Random Forest). (*) considered as a continuous.

| Variable Name | Mutual Information Score | Description of the variable |
| --- | --- | --- |
| 'FCWYLK00' | 0.0550398990589713 | 'WellbeingGrid: How happy is CM with the way they look (*)' |
| 'FCMDSG00' | 0.0468473962396024 | 'FeelingsGrid: I found it hard to think properly or concentrate' |
| 'ECQ10E00' | 0.0431879997651521 | 'The school you go to - Happiness (*)' |
| 'FCSTIR00' | 0.0389952227717974 | 'EducMotGrid: How often do you get tired at school?' |
| 'FCMDSL00' | 0.0363040293139687 | 'FeelingsGrid: I thought I could never be as good as other kids' |
| 'FCMDSM00' | 0.0347405403698828 | 'FeelingsGrid: I did everything wrong' |
| 'FCMDSA00' | 0.0347070931353467 | 'FeelingsGrid: I felt miserable or unhappy' |
| 'APWRBM0AR' | 0.0339183029042818 | 'Problems at birth or in first week MC1 recoded' |
| 'FCMDSI00' | 0.0327008531225379 | 'FeelingsGrid: I was a bad person' |
| 'ECBFPC00' | 0.0326242969005155 | 'Body Fat measurement displayed on scales (*)' |
| 'FCMDSH00' | 0.0308730219028320 | 'FeelingsGrid: I hated myself' |
| 'FCMNWO00' | 0.0306914846939420 | 'EducMotGrid: How often difficult to keep mind on work at school? [NCDS, BCS]' |
| 'FCSUNH00' | 0.0305796193259887 | 'EducMotGrid: How often do you feel unhappy at school?' |
| 'FCMDSD00' | 0.0305538101605795 | 'FeelingsGrid: I was very restless' |
| 'FCMISO00' | 0.0301063182137617 | 'How often do other pupils misbehave in lessons' |
| 'FCMDSJ00' | 0.0291634406042413 | 'FeelingsGrid: I felt lonely' |
| 'FCMDSK00' | 0.0287241309993288 | 'FeelingsGrid: I thought nobody really loved me' |
| 'FCMDSB00' | 0.0261175950137500 | 'FeelingsGrid: I didnt enjoy anything at all' |
| 'FCMDSC00' | 0.0260523151402254 | 'FeelingsGrid: I felt so tired I just sat around and did nothing' |
| 'FCHARM00' | 0.0238283206767942 | 'In the past year has CM self-harmed' |
| 'FCSCHL00' | 0.0235879091970486 | 'WellbeingGrid: How happy is CM with school (*)' |
| 'FCMDSE00' | 0.0235331185948035 | 'FeelingsGrid: I felt I was no good any more' |
| 'FCSLTR00' | 0.0232800521838257 | 'During the last 4 weeks how often did CM awaken during sleep' |
| 'FCTRST0A' | 0.0231562985178211 | 'How much does CM trust others (*)' |
| 'FCSLLN00' | 0.0230700946015678 | 'During the last 4 weeks how long does going to sleep usually take' |
| 'FCHURT00' | 0.0225600482133968 | 'How often other children hurt or pick on CM' |
| 'ECQ39X00' | 0.0218067050314816 | 'How often do you feel school is a waste of time?' |
| 'FCQUAM00' | 0.0216997326448959 | 'How often does CM argue with mother' |
| 'ECQ11E00' | 0.0212092066723714 | 'I feel good about myself' |
| 'FCGDSF00' | 0.0210126207204252 | 'RosenbergGrid: I feel good about myself' |
| 'FCINTH00' | 0.0209487418870821 | 'Does CM ever use the internet at home' |
| 'ECQ01X00' | 0.0197689922249973 | 'How often do you listen to or play music, not at school?' |
| 'FCPTNT00' | 0.0191389324689208 | 'How patient is CM (*)' |
| 'FCBFPC00' | 0.0190766529638091 | 'Body fat percentage (*)' |
| 'FCSTYY00' | 0.0183773115910326 | 'How likely is it CM will remain in education at the end of year 11? (*)' |
| 'ECQ79X00' | 0.0180675868029252 | 'In the last 4 weeks, how often did you get angry?' |
| 'FCSCWA00' | 0.0179601633445050 | 'EducMotGrid: How often do you feel school is a waste of time?' |
| 'FCSTYU00' | 0.0178220423647995 | 'How likely is it CM will go to university? (Scale 0-100%) (*)' |
| 'FCVICG00' | 0.0172582794814721 | 'VictimisGrid: CM insulted, threatened, shouted at' |
| 'FCTVHO00' | 0.0172485290068537 | 'Hours per WEEKDAY spent watching TV or videos on computer' |
| 'ECQ10A00' | 0.0171792961946506 | 'Your school work - Happiness (*)' |
| 'FCMDSF00' | 0.0171790459725772 | 'FeelingsGrid: I cried a lot' |
| 'ECQ23X00' | 0.0170427339999602 | 'How safe is it to walk, play or hang out in this area during the day?' |
| 'FCOTWD00' | 0.0168927230344541 | 'When CM goes out, how often do parents know what CM does?' |
| 'FCCOMH00' | 0.0160765332753661 | 'Hours per WEEKDAY spent playing electronic games' |
| 'FCMISB00' | 0.0158246279001055 | 'How often does CM misbehave in lessons' |
| 'ECQ48X00' | 0.0152051612462453 | 'How many of your friends are going to the same secondary school as you?' |
| 'FCORGA00' | 0.0149859559949475 | 'ActivGrid: Go to youth clubs/scouts/girlguides or oth organised activities?' |
| 'FCSCWK00' | 0.0148237887959399 | 'WellbeingGrid: How happy is CM with school work (*)' |
| 'FCBULP00' | 0.0146267229834620 | 'How often CM hurts or picks on brothers or sisters' |
| 'FCCGHE00' | 0.0146061449643777 | 'CMs general level of health' |
| 'ECQ14X00' | 0.0145354060419817 | 'Are your friends mostly boys, mostly girls or a mixture?' |
| 'FDKESSL' | 0.0141946169822889 | 'S6 DV Kessler K6 Scale (*)' |
| 'ECQ29X00' | 0.0139274673485278 | 'How much do you like school?' |
| 'ECQ02X00' | 0.0130201266042567 | 'How often do you draw, paint or make things, not at school?' |
| 'FCCINE00' | 0.0126583214925282 | 'ActivGrid: Go to the cinema?' |
| 'ECQ56X00' | 0.0126369533465869 | 'How often do other children hurt you or pick on you on purpose?' |
| 'FCHLPC00' | 0.0125162929529202 | 'How often does anyone at home help with CMs homework' |
| 'FCCYCF00' | 0.0123727203137436 | 'How often does CM use a bicycle' |
| 'FCRLQF00' | 0.0120238909555903 | 'How close is CM with father' |

**Table S6.** The distribution and missing values of the variables selected through feature selection using mutual information of the best outer fold of the best model (Balanced Random Forest). (*) considered as a continuous.

| Variable Name | Description of the variable | Mean | Median | Std | Skewness | Kurtosis | Missing values (%) |
| --- | --- | --- | --- | --- | --- | --- | --- |
| 'FCWYLK00' | 'WellbeingGrid: How happy is CM with the way they look (*)' | 3.332762 | 3 | 1.732767 | 0.396676 | 2.269431 | 7.753165 |
| 'FCMDSG00' | 'FeelingsGrid: I found it hard to think properly or concentrate' | 1.795494 | 2 | 0.728712 | 0.334944 | 1.931986 | 8.702532 |
| 'ECQ10E00' | 'The school you go to - Happiness (*)' | 2.819672 | 2 | 2.009895 | 0.865982 | 2.470624 | 3.481013 |
| 'FCSTIR00' | 'EducMotGrid: How often do you get tired at school?' | 2.41129 | 3 | 0.90958 | -0.15475 | 2.113348 | 1.898734 |
| 'FCMDSL00' | 'FeelingsGrid: I thought I could never be as good as other kids' | 1.590674 | 1 | 0.741724 | 0.819809 | 2.264019 | 8.386076 |
| 'FCMDSM00' | 'FeelingsGrid: I did everything wrong' | 1.459413 | 1 | 0.660025 | 1.125111 | 3.050441 | 8.386076 |
| 'FCMDSA00' | 'FeelingsGrid: I felt miserable or unhappy' | 1.792746 | 2 | 0.624097 | 0.179022 | 2.418944 | 8.386076 |
| 'APWRBM0AR' | 'Problems at birth or in first week MC1 recoded' | 3.134921 | 1 | 5.811771 | 3.726686 | 17.28662 | 0.316456 |
| 'FCMDSI00' | 'FeelingsGrid: I was a bad person' | 1.341924 | 1 | 0.591036 | 1.531445 | 4.2619 | 7.911392 |
| 'ECBFPC00' | 'Body Fat measurement displayed on scales (*)' | 22.80987 | 21.1 | 8.828785 | 0.728466 | 3.221745 | 3.797468 |
| 'FCMDSH00' | 'FeelingsGrid: I hated myself' | 1.452668 | 1 | 0.666887 | 1.168379 | 3.107366 | 8.06962 |
| 'FCMNWO00' | 'EducMotGrid: How often difficult to keep mind on work at school? [NCDS, BCS]' | 2.503226 | 3 | 0.859231 | -0.27762 | 2.360522 | 1.898734 |
| 'FCSUNH00' | 'EducMotGrid: How often do you feel unhappy at school?' | 2.925806 | 3 | 0.826253 | -0.56663 | 2.934936 | 1.898734 |
| 'FCMDSD00' | 'FeelingsGrid: I was very restless' | 1.680556 | 2 | 0.686798 | 0.508817 | 2.18418 | 8.860759 |
| 'FCMISO00' | 'How often do other pupils misbehave in lessons' | 1.977419 | 2 | 0.774893 | 0.247359 | 2.231804 | 1.898734 |
| 'FCMDSJ00' | 'FeelingsGrid: I felt lonely' | 1.595525 | 1 | 0.714322 | 0.769609 | 2.30812 | 8.06962 |
| 'FCMDSK00' | 'FeelingsGrid: I thought nobody really loved me' | 1.451557 | 1 | 0.685507 | 1.208717 | 3.111752 | 8.544304 |
| 'FCMDSB00' | 'FeelingsGrid: I didnt enjoy anything at all' | 1.47487 | 1 | 0.606512 | 0.890642 | 2.785745 | 8.702532 |
| 'FCMDSC00' | 'FeelingsGrid: I felt so tired I just sat around and did nothing' | 1.769097 | 2 | 0.688148 | 0.334958 | 2.11451 | 8.860759 |
| 'FCHARM00' | 'In the past year has CM self-harmed' | 1.776248 | 2 | 0.417117 | -1.3257 | 2.757479 | 8.06962 |
| 'FCSCHL00' | 'WellbeingGrid: How happy is CM with school (*)' | 3.046472 | 3 | 1.804088 | 0.67821 | 2.48789 | 8.06962 |
| 'FCMDSE00' | 'FeelingsGrid: I felt I was no good any more' | 1.495652 | 1 | 0.690578 | 1.048032 | 2.795836 | 9.018987 |
| 'FCSLTR00' | 'During the last 4 weeks how often did CM awaken during sleep' | 4.241436 | 5 | 1.559426 | -0.64796 | 2.259586 | 3.006329 |
| 'FCTRST0A' | 'How much does CM trust others (*)' | 5.714519 | 6 | 2.328791 | -0.18648 | 2.519512 | 3.006329 |
| 'FCSLLN00' | 'During the last 4 weeks how long does going to sleep usually take' | 2.420622 | 2 | 1.33607 | 0.653171 | 2.267588 | 3.322785 |
| 'FCHURT00' | 'How often other children hurt or pick on CM' | 4.475298 | 5 | 1.785604 | -0.90904 | 2.325113 | 7.120253 |
| 'ECQ39X00' | 'How often do you feel school is a waste of time?' | 3.08985 | 3 | 0.984165 | -0.87334 | 2.721198 | 4.905063 |
| 'FCQUAM00' | 'How often does CM argue with mother' | 2.862369 | 3 | 1.189048 | -0.21301 | 1.913484 | 9.177215 |
| 'ECQ11E00' | 'I feel good about myself' | 1.680672 | 2 | 0.797014 | 1.134334 | 3.912966 | 5.85443 |
| 'FCGDSF00' | 'RosenbergGrid: I feel good about myself' | 2.013769 | 2 | 0.828261 | 0.539256 | 2.788247 | 8.06962 |
| 'FCINTH00' | 'Does CM ever use the internet at home' | 5.722756 | 6 | 1.864183 | -0.49618 | 2.464884 | 1.265823 |
| 'ECQ01X00' | 'How often do you listen to or play music, not at school?' | 1.819376 | 1 | 1.255338 | 1.466789 | 3.876434 | 3.639241 |
| 'FCPTNT00' | 'How patient is CM (*)' | 5.034314 | 5 | 2.519411 | -0.06087 | 2.437297 | 3.164557 |
| 'FCBFPC00' | 'Body fat percentage (*)' | 22.00578 | 21.6 | 9.870754 | 0.460814 | 2.728201 | 6.962025 |
| 'FCSTYY00' | 'How likely is it CM will remain in education at the end of year 11? (*)' | 77.37377 | 90 | 26.267 | -1.09533 | 3.366632 | 3.481013 |
| 'ECQ79X00' | 'In the last 4 weeks, how often did you get angry?' | 2.848229 | 3 | 1.180029 | 0.104334 | 2.266556 | 6.170886 |
| 'FCSCWA00' | 'EducMotGrid: How often do you feel school is a waste of time?' | 3.050081 | 3 | 0.907937 | -0.78676 | 2.89105 | 2.056962 |
| 'FCSTYU00' | 'How likely is it CM will go to university? (Scale 0-100%) (*)' | 58.34912 | 60 | 30.89029 | -0.34988 | 2.040725 | 9.810127 |
| 'FCVICG00' | 'VictimisGrid: CM insulted, threatened, shouted at' | 1.446154 | 1 | 0.497518 | 0.216645 | 1.046935 | 7.436709 |
| 'FCTVHO00' | 'Hours per WEEKDAY spent watching TV or videos on computer' | 5.415064 | 6 | 1.695759 | -0.22941 | 2.348814 | 1.265823 |
| 'ECQ10A00' | 'Your school work - Happiness (*)' | 3.216966 | 3 | 1.696856 | 0.53211 | 2.666714 | 3.006329 |
| 'FCMDSF00' | 'FeelingsGrid: I cried a lot' | 1.420139 | 1 | 0.665061 | 1.306102 | 3.399563 | 8.860759 |
| 'ECQ23X00' | 'How safe is it to walk, play or hang out in this area during the day?' | 1.985149 | 2 | 0.757187 | 0.527602 | 3.116555 | 4.113924 |
| 'FCOTWD00' | 'When CM goes out, how often do parents know what CM does?' | 1.872449 | 2 | 0.914984 | 0.721766 | 2.528 | 6.962025 |
| 'FCCOMH00' | 'Hours per WEEKDAY spent playing electronic games' | 4.666667 | 5 | 2.319111 | -0.12547 | 1.852806 | 1.265823 |
| 'FCMISB00' | 'How often does CM misbehave in lessons' | 3.231884 | 3 | 0.771058 | -0.9302 | 3.721764 | 1.740506 |
| 'ECQ48X00' | 'How many of your friends are going to the same secondary school as you?' | 2.557823 | 2 | 1.089702 | 0.982289 | 4.277376 | 6.962025 |
| 'FCORGA00' | 'ActivGrid: Go to youth clubs/scouts/girlguides or oth organised activities?' | 4.102894 | 5 | 1.999764 | -0.3243 | 1.35371 | 1.582278 |
| 'FCSCWK00' | 'WellbeingGrid: How happy is CM with school work (*)' | 3.173242 | 3 | 1.550691 | 0.514963 | 2.698793 | 7.753165 |
| 'FCBULP00' | 'How often CM hurts or picks on brothers or sisters' | 4.07971 | 5 | 1.908284 | -0.52492 | 1.65596 | 12.65823 |
| 'FCCGHE00' | 'CMs general level of health' | 2.685065 | 3 | 1.014451 | 0.079827 | 2.497136 | 2.531646 |
| 'ECQ14X00' | 'Are your friends mostly boys, mostly girls or a mixture?' | 2.282895 | 3 | 0.888645 | -0.47126 | 1.632412 | 3.797468 |
| 'FDKESSL' | 'S6 DV Kessler K6 Scale (*)' | 8.051155 | 7 | 4.968232 | 0.685636 | 2.969701 | 4.113924 |
| 'ECQ29X00' | 'How much do you like school?' | 1.829752 | 2 | 0.662956 | 0.202278 | 2.236821 | 4.272152 |
| 'ECQ02X00' | 'How often do you draw, paint or make things, not at school?' | 2.479542 | 2 | 1.358938 | 0.511917 | 1.982967 | 3.322785 |
| 'FCCINE00' | 'ActivGrid: Go to the cinema?' | 4.107544 | 4 | 1.087635 | 0.003544 | 2.87987 | 1.424051 |
| 'ECQ56X00' | 'How often do other children hurt you or pick on you on purpose?' | 3.630616 | 4 | 1.926135 | -0.14121 | 1.448277 | 4.905063 |
| 'FCHLPC00' | 'How often does anyone at home help with CMs homework' | 2.26129 | 2 | 1.076756 | 0.282825 | 1.799488 | 1.898734 |
| 'FCCYCF00' | 'How often does CM use a bicycle' | 5.6016 | 7 | 2.382427 | -0.56246 | 1.94684 | 1.107595 |
| 'FCRLQF00' | 'How close is CM with father' | 2.912969 | 3 | 1.229663 | 0.066562 | 2.056526 | 7.278481 |

**Table S7.** Baseline Characteristics of the whole population for the Early High Distress Cohort and participant variables in the four groups based on longitudinal trajectories of total scores on the Strengths and Difficulties Questionnaire between the ages 11 and 17. (*) indicates that are statistically significant compared to the group decreasing to non-pathological levels. All the variables are reported at age 11, except for those assessed during the initial visit (i.e., parent´s education, sex, and ethnicity).

| Characteristics | Whole Population  (N=632) | Decreasing to non-pathological (N=285) | Decreasing to slightly raised (N=106) | High with slight improvement (N=107) | High increasing or no improvement (N=134) |
| --- | --- | --- | --- | --- | --- |
| Sociodemographic data | | | | | |
| Female | 253 (40%) | 95 (33%) | 45 (42.45%) | 46 (42.99%) | 67 (50%)* |
| Poverty indicator | 236 (37.46%) | 87 (30.53%) | 44 (41.51%)* | 51 (48.57%)* | 54 (40.30%)* |
| Education of parents  NVQ level 1  NVQ level 2  NVQ level 3  NVQ level 4  NVQ level 5  Overseas  Other | 48 (7.61%)  173 (27.42%)  55 (8.72%)  103 (16.32%)  15 (2.38%)  20 (3.17%)  217 (34.39%) | 21 (7.37%)  64 (22.46%)  25 (8.77%)  58 (20.35)  9 (3.16)  12 (4.21%)  96 (33.68%) | 4 (3.81%)  34 (32.38%)  10 (9.52%)  18 (17.14%)  1 (0.95%)  1 (0.95%)  37 (35.24%) | 7 (6.54%)  27 (25.23%)  11 (10.28%)  15 (14.02%)  3 (2.80%)  5 (4.67%)  39 (36.45%) | *  16 (11.94%)  48 (35.82%)  9 (6.72%)  12 (8.96%)  2 (1.49%)  2 (1.49%)  45 (33.58%) |
| Ethnicity  White  Mixed  Indian  Pakistani and Bangladeshi  Black or Black British  Other Ethnic group | **528 (83.94%)**  **23 (3.66%)**  **12 (1.91%)**  **42 (6.68%)**  **17 (2.70%)**  **7 (1.11%)** | 232 (81.69%)  8 (2.82%)  8 (2.82)  25 (8.80%)  7 (2.46%)  4 (1.41%) | 83 (78.30%)  6 (5.66%)  3 (2.83%)  8 (7.55%)  3 (2.83%)  3 (2.83%) | 93 (86.92%)  6 (5.61%)  0 (0%)  6 (5.61%)  2 (1.87)  0 (0%) | 120 (90.91%)  3 (2.27%)  1 (0.76%)  3 (2.27%)  5 (3.79%)  0 (0%) |
| Behavioral | | | | | |
| Other children hurt you  Most days  About once a week  About once a month  Every few months  Less often  Never | 133 (22.13%)  90 (14.98%)  55 (9.15%)  53 (8.882%)  128 (21.30%)  142 (23.63%) | 45 (16.54%)  32 (11.76%)  32 (11.76%)  29 (10.66%)  63 (23.16%)  71 (26.10%) | 18 (17.65%)  17 (16.67%)  6 (5.88%)  8 (7.84%)  22 (21.57%)  31 (30.39%) | *  29 (28.43%)  21 (20.59%)  8 (7.84%)  7 (6.86%)  23 (22.55%)  14 (13.73%) | *  41 (32.80%)  20 (16.00%)  9 (7.20%)  9 (7.20%)  20 (16%)  26 (20.80%) |
| Other pupils misbehave  All of the time  Most of the time  Some of the time  Never | 17 (2.82%)  53 (8.80%)  278 (46.18%)  254 (42.19%) | 5 (1.82%)  19 (6.93%)  116 (42.34%)  134 (48.91%) | 2 (1,96%)  11 (10.78%)  50 (49,02%)  39 (38,24%) | 4 (3,96%)  8 (7,92%)  51 (50,50%)  38 (37,62%) | *  6 (4,80%)  15 (12.00%)  61 (48.80%)  43 (34,40%) |
| Hurting others  Most days  About once a week  About once a month  Every few months  Less often  Never | 24 (4%)  32 (5.33%)  34 (5.67%)  23 (3.83%)  145 (24.17%)  342 (57.00%) | 8 (2.96%)  13 (4.81%)  11 (4.07%)  12 (4.44%)  62 (22.96%)  164 (60.74%) | 5 (4.85%)  5 (4.85%)  7 (6.80%)  2 (1.94%)  33 (32.04%)  51 (49.51%) | 7 (6.86%)  7 (6.86%)  4 (3.92%)  5 (4.90%)  24 (23.53%)  55 (53.92%) | 4 (3.20%)  7 (5.60%)  12 (9.60%)  4 (3.20%)  26 (20.80%)  72 (57.60%) |
| School | | | | | |
| Tired at the school  All of the time  Most of the time  Some of the time  Never | 90 (14.95%)  143 (23.75%)  257 (42.69%)  112 (18.60%) | 29 (10.66%)  58 (21.32%)  132 (48.53%)  53 (19.49%) | 14 (13.59%)  34 (33.01%)  39 (37.86%)  16 (15.53%) | *  25 (24.27%)  21 (20.39%)  37 (35.92%)  20 (19.42%) | 22 (17.74%)  30 (24.19%)  49 (39.52%)  23 (18.55%) |
| Perception | | | | | |
| Feel good about myself  Strongly agree  Agree  Disagree  Strongly disagree | 289 (48.57%)  232 (38.99%)  49 (8.24%)  25 (4.20%) | 143 (53.96%)  108 (40.75%)  8 (3.02%)  6 (2.26%) | 50 (48,54%)  43 (41,75%)  9 (8,74%)  1 (0.97%) | *  46 (45,10%)  38 (37,25%)  7 (6,86%)  11 (10.78%) | *  50 (40,00%)  43 (34,40%)  25 (20,00%)  7 (5.60%) |
| Health | | | | | |
| Smoking | 36 (6.04%) | 11 (4.09%) | 9 (8.82%) | 7 (7%) | 9 (7%) |
| Alcohol | 81 (13.73%) | 27 (9.96%) | 16 (16%) | 16 (16%) | 22 (18.18%)* |
| Relationships and Socializing | | | | | |
| Argue with friends  At least once a week  At least once a month  Less often than once a month  Never  Don't have any friends | 74 (12.31%)  96 (15.97%)  113 (18.80%)  165 (27.45%)  153 (25.46%) | 27 (10.00%)  42 (15.56%)  58 (21.48%)  78 (28.89%)  65 (24.07%) | 8 (7.84%)  14 (13.73%)  17 (16.67%)  36 (35.29%)  27 (26.47%) | *  19 (18.81%)  17 (16.83%)  13 (12.87%)  18 (17.82%)  34 (33.66%) | 20 (15.63%)  23 (17.97%)  25 (19.53%)  33 (25.78%)  27 (21.1%) |
| Happiness with family | 1.9706 (±1.65) | 1.8669 (±1.5988) | 1.9135 (±1.5834) | 2.3204 (±1.8641)* | 1.9606 (±1.6105) |
| Happiness with friends | 3.5164 (±1.6695) | 3.4477 (±1.6490) | 3.6373 (±1.6878) | 3.7087 (±1.6546) | 3.4127 (±1.7124) |

**Table. S8.** Characteristics of the whole population for the Early High Distress Cohort and participant variables in the four groups based on longitudinal trajectories of total scores on the Strengths and Difficulties Questionnaire between ages 11 and 17. (*) indicates that are statistically significant compared to the group decreasing to non-pathological levels. All the variables are measured at age 14.

| Characteristics | Whole Population  (N=632) | Decreasing to non-pathological (N=285) | Decreasing to slightly raised (N=106) | High with slight improvement (N=107) | High increasing or no improvement (N=134) |
| --- | --- | --- | --- | --- | --- |
| Sociodemographic data | | | | | |
| Poverty indicator | 285 (45.24%) | 107 (37.54%) | 51 (48.11%) | 62 (59.05%)* | 65 (48.51%)* |
| Behavioral | | | | | |
| Other children hurt you  Most days  About once a week  About once a month  Every few months  Less often  Never | 20 (3.41%)  17 (2.90%)  14 (2.39%)  20 (3.41%)  140 (23.85%)  376 (64.05%) | 4 (1.47%)  6 (2.21%)  4 (1.47%)  6 (2.21%)  62 (22.79%)  190 (69.85%) | 5 (4.95%)  4 (3.96%)  3 (2.97%)  5 (4.95%)  20 (19.80%)  64 (63.37%) | 3 (3.16%)  4 (4.21%)  5 (5.26%)  3 (3.16%)  26 (27.37%)  54 (56.84%) | *  8 (6.72%)  3 (2.52%)  2 (1.68%)  6 (5.04%)  32 (26.89%)  68 (57.14%) |
| Other pupils misbehave  All of the time  Most of the time  Some of the time  Never | 183 (29.52%)  278 (44.84%)  149 (24.03%)  10 (1.61%) | 58 (20.57%)  134 (47.52%)  86 (30.50%)  4 (1.42%) | 26 (25,49%)  48 (47.06%)  26 (25,49%)  2 (1,96%) | *  37 (34,91%)  48 (45,28%)  19 (17,92%)  2 (1,89%) | *  62 (47,69%)  48 (36.92%)  18 (13.85%)  2 (1,54%) |
| Patience | 5.03 (±2.52) | 5.46 (±2.39) | 5.2647 (±2.2861) | 4.6762 (±2.5476)* | 4.2248 (±2.7164)* |
| Hurt yourself | 130 (22.38%) | 29 (10.78%) | 22 (22%)* | 28 (29.79%)* | 51 (43.22%)* |
| School | | | | | |
| Tired at the school  All of the time  Most of the time  Some of the time  Never | 123 (19.84%)  177 (28.55%)  262 (42.26%)  58 (9.35%) | 30 (10%)  69 (24.47%)  143 (50.71%)  40 (14.18%) | *  18 (17.31%)  32 (30.77%)  48 (46.15%)  6 (5.77%) | *  31 (29.81%)  31 (29.81%)  36 (34.62%)  6 (5.77%) | *  44 (33.85%)  45 (34.62%)  35 (26.92%)  6 (4.62%) |
| Perception | | | | | |
| Feel good about myself  Strongly agree  Agree  Disagree  Strongly disagree | 164 (28.23%)  276 (47.50%)  110 (18.93%)  31 (5.34%) | 85 (31.72%)  149 (55.60%)  28 (10.45%)  6 (2.24%) | *  22 (21.78%)  50 (49.50%)  25 (24.75%)  4 (3.96%) | *  32 (33.68%)  40 (42.11%)  18 (18.95%)  5 (5.26%) | *  25 (21.37%)  37 (31.62%)  39 (33.33%)  16 (13.68%) |
| Nobody loved me  Not true  Sometimes  True | 381 (65.92%)  133 (23.01%)  64 (11.07%) | 217 (80.97%)  37 (13.80%)  14 (5.22) | *  63 (63,64%)  30 (30,30%)  6 (6,06) | *  51 (54,26%)  28 (29,79%)  15 (15,96%) | *  50 (42,74%)  38 (32,48%)  29 (24,79%) |
| Heath | | | | | |
| Any alcoholic drink | 243 (41.68%) | 93 (34.19%) | 50 (50.51%)* | 41 (44.57%) | 59 (49.17%)* |
| General health  Excellent  Very good  Good  Fair  Poor | 83 (13.47%)  174 (28.25%)  234 (37.99%)  104 (16.88%)  21 (3.41%) | 42 (15.11%)  91 (32.73%)  107 (38.49%)  34 (12.23%)  4 (1.44%) | 11 (10.68%)  32 (31.07%)  40 (38.84%)  20 (19.42%)  0 (0%) | *  19 (18.10%)  24 (22.86%)  36 (34.29%)  18 (17.14%)  8 (7.62) | *  11 (8.46%)  27 (20.77%)  51 (39.23%)  32 (24.62%)  9 (6.92%) |
| Socialization and relationships | | | | | |
| Argue with mother  Most days  More than once a week  Less than once a week  Hardly ever  Never | 104 (18.12%)  111 (19.34%)  146 (25.44%)  186 (32.40%)  27 (4.70%) | 24 (9.06%)  46 (17.36%)  72 (27.17%)  104 (39.25%)  19 (7.17) | 15 (15.2%)  25 (25.3%)  26 (26.3%)  29 (29.3%)  4 (4.04%) | *  23 (24.47%)  18 (19.15%)  25 (26.60%)  25 (26.60%)  3 (3.19%) | *  42 (36.21%)  22 (18.97%)  23 (19.83%)  28 (24.14%)  1 (0.86%) |
| Argue with father  Most days  More than once a week  Less than once a week  Hardly ever  Never | 48 (9.34%)  67 (13.04%)  118 (22.96%)  196 (38.13%)  85 (16.54%) | 17 (7.11%)  21 (8.79%)  50 (20.92%)  109 (45.61%)  42 (17.57%) | 9 (10.23%)  12 (13.64%)  21 (23.86%)  30 (34.09%)  16 (18.18%) | 5 (5.88%)  16 (18.82)  21 (24.71%)  29 (34.12)  14 (16.47%) | *  17 (16.67%)  18 (17.65%)  26 (25.49%)  28 (27.45%)  13 (12.75%) |
| Close with mother  Not very close  Fairly close  Very close  Extremely close  I don’t have a mother/I am not in contact | 24 (4.07%)  107 (18.17%)  222 (37.69%)  225 (38.20%)  11 (1.87%) | 3 (1.10%)  38 (13.92%)  115 (42.12%)  112 (41.03%)  5 (1.83%) | 6 (5.94%)  16 (15.84%)  42 (41.58%)  35 (34.65%)  2 (1.98%) | *  5 (5.26%)  24 (25.26%)  30 (31.58%)  35 (36.84%)  1 (1.05%) | *  10 (8.33%)  29 (24.17%)  35 (29.17%)  43 (35.83%)  3 (2.50%) |
| Close with father  Not very close  Fairly close  Very close  Extremely close  I don’t have a mother/I am not in contact | 87 (14.85%)  140 (23.89%)  165 (28.16%)  125 (21.33%)  69 (11.77%) | 29 (10.66%)  61 (22.43%)  78 (28.68%)  74 (27.21%)  30 (11.03%) | 15 (15%)  23 (23.00%)  34 (34%)  16 (16%)  12 (12%) | *  20 (21.28%)  26 (27.66%)  19 (20.21%)  19 (20.21%)  10 (10.64%) | *  23 (19.17%)  30 (25.00%)  34 (28.33%)  16 (13.33%)  17(14.17%) |
| Close friends | 582 (94%) | 270 (96%) | 92 (90%)* | 97 (93%) | 123 (93.89%) |
